# Supplementary material for: Naturally Occurring Deletions of Hunchback Binding Sites in the Even-Skipped Stripe 3+7 Enhancer
Source: PLoS One. 2014 May 1;9(5):e91924. doi: 10.1371/journal.pone.0091924 (PMC4006794; doi:10.1371/journal.pone.0091924)
Supplement: Table S2 — Predicted Hb binding sites in the regulatory region upstream of eve, in 5 Drosophila species and the source alignments. Sheet one lists the Jaspar predicted Hb sites in D. melanogaster (D.mel), D. simulans (D.sim), D. sechellia (D.sec), D. pseudoobscura (D.pse) and D. yakuba (D.yak). Coordinates are according to a manually edited Multiz alignment of 12 Drosophila species. Hb8 is at 4495 and Hbs1 is at 4871. See materials and methods for details. Sheet two contains multiple alignments of the eve region. (XLS) [file pone.0091924.s005.xls]

## Sheet: Predicted_HB_bindingsites
Spe	Score	RelScore	Start	Strand	Seq
D.pse	9.806	0.907033	403	-1	ACAAAAAAAA
D.pse	6.876	0.816762	445	1	TAGTAAAACA
D.pse	9.876	0.909189	633	1	TAGTAAAAAA
D.pse	7.484	0.835494	908	1	CAAATAAAAT
D.pse	7.01	0.82089	933	1	TCCCAAAAAC
D.pse	7.888	0.847941	1116	1	GCAAAAGAAA
D.pse	8.232	0.858539	1299	1	CAATAAAGAT
D.pse	6.577	0.80755	1501	1	CAACCAAAAT
D.pse	6.654	0.809922	1841	-1	GCAGAAAATA
D.pse	7.01	0.82089	1921	1	GCCAAAAGAT
D.pse	9.917	0.910452	2996	1	TCCTAAAAAA
D.pse	9.332	0.892429	3115	-1	CCACAAAAAG
D.pse	9.554	0.899269	3137	-1	GAACAAAAAG
D.pse	7.747	0.843596	3160	1	CGACAAAAAG
D.pse	11.028	0.944681	3181	-1	CAAAAAAAAA
D.pse	9.502	0.897667	3208	-1	TCATAAAAAG
D.pse	6.484	0.804684	3243	-1	GTGGAAAAAA
D.pse	7.736	0.843258	3429	-1	GCGTAATAAA
D.pse	9.232	0.889348	3450	1	CACTAAAAAT
D.pse	8.654	0.87154	3464	1	CCGAAAAAAC
D.pse	10.139	0.917292	3531	-1	CAATAAAAAG
D.pse	6.514	0.805609	3649	1	GCATTAGAAA
D.pse	11.291	0.952784	3695	-1	GAACAAAAAA
D.pse	10.332	0.923238	3725	-1	GCACAAAAAT
D.pse	8.332	0.86162	3762	-1	CCATAAACAA
D.pse	7.888	0.847941	3841	1	GCAAAACAAA
D.pse	10.917	0.941262	3918	-1	CCATAAAAAT
D.pse	11.291	0.952784	4065	-1	GAACAAAAAA
D.pse	9.239	0.889564	4086	-1	GCGAAAAAAG
D.pse	9.391	0.894247	4107	-1	GGGAAAAAAA
D.pse	10.239	0.920373	4161	-1	GAATTAAAAA
D.pse	10.139	0.917292	4178	-1	CAATAAAAAC
D.pse	6.595	0.808104	4406	-1	TCTTAAAAAT
D.pse	8.291	0.860357	4433	-1	GAGAAAAGAA
D.pse	7.204	0.826867	4449	-1	GAACAGAAAA
D.pse	6.484	0.804684	4461	-1	CGGAAAAGAA
D.pse	9.917	0.910452	4495	-1	TCATAAAAAT
D.pse	7.525	0.836757	4544	-1	GAAAAACAAA
D.pse	8.239	0.858755	5828	-1	CCATAAAATA
D.pse	10.917	0.941262	5876	-1	CCATAAAAAT
D.pse	8.817	0.876562	5998	1	GAATAAAGAT
D.pse	6.554	0.806841	6111	1	CAATAAAGCA
D.pse	6.888	0.817131	6180	-1	GCGAAATAAA
D.pse	7.414	0.833337	7040	1	GCATAACAAT
D.pse	8.431	0.86467	7435	-1	GCAATAAAAT
D.pse	6.384	0.801604	7615	-1	AAATAAACAA
D.pse	6.917	0.818025	7768	-1	GGCTAAAACA
D.pse	8.239	0.858755	7943	1	TCATAAAACA
D.pse	10.654	0.933159	8038	-1	GCGCAAAAAA
D.pse	7.151	0.825234	8410	1	TCATAATAAA
D.pse	6.391	0.801819	8420	-1	GGGAAAAACA
D.pse	7.239	0.827945	8784	1	TCATAAAAGA
D.pse	6.384	0.801604	8792	1	GAGCAAATAA
D.pse	7.069	0.822708	9157	1	GAAACAAAAG
D.yak	7.566	0.83802	161	1	GCACATAAAA
D.yak	11.461	0.958022	633	1	GAGTAAAAAA
D.yak	7.484	0.835494	985	1	CAAATAAAAT
D.yak	7.595	0.838913	1010	1	ACCTAAAAAC
D.yak	6.577	0.80755	1501	1	CAACCAAAAT
D.yak	6.969	0.819627	1591	-1	GAGGAAAGAA
D.yak	8.332	0.86162	2726	-1	GCAAAAAGAT
D.yak	9.291	0.891166	2823	1	AAGTAAAAAA
D.yak	9.01	0.882508	2958	1	GCCCAAAAAT
D.yak	7.332	0.830811	2977	1	CCAAAAAGAC
D.yak	9.917	0.910452	2996	1	TCCTAAAAAA
D.yak	7.595	0.838913	3033	1	GCACAAAGAG
D.yak	9.332	0.892429	3115	-1	CCACAAAAAG
D.yak	8.806	0.876223	3138	-1	GAAACAAAAA
D.yak	9.332	0.892429	3160	1	CCACAAAAAG
D.yak	8.121	0.855119	3180	-1	AAAGAAAAAA
D.yak	9.502	0.897667	3208	-1	TCATAAAAAG
D.yak	7.109	0.82394	3219	-1	CCCTGAAAAA
D.yak	9.232	0.889348	3450	1	CACTAAAAAT
D.yak	9.069	0.884326	3470	1	CCGGAAAAAA
D.yak	10.139	0.917292	3531	-1	CAATAAAAAG
D.yak	6.694	0.811154	3586	1	GCAGTAAAAG
D.yak	6.514	0.805609	3641	1	GCATTAGAAA
D.yak	11.291	0.952784	3695	-1	GAACAAAAAA
D.yak	10.332	0.923238	3725	-1	GCACAAAAAT
D.yak	7.18	0.826128	3747	-1	CCGTAAAGAG
D.yak	6.747	0.812787	3841	1	GGGCAAAGAA
D.yak	10.917	0.941262	3918	-1	CCATAAAAAT
D.yak	11.291	0.952784	4065	-1	GAACAAAAAA
D.yak	9.239	0.889564	4086	-1	GCGAAAAAAG
D.yak	7.069	0.822708	4107	-1	GGGAAAAGAA
D.yak	10.239	0.920373	4161	-1	GAATTAAAAA
D.yak	7.232	0.82773	4189	1	GACGAAAAAC
D.yak	7.554	0.83765	4203	1	GAGGAAAAAC
D.yak	9.917	0.910452	4495	-1	TCATAAAAAT
D.yak	6.384	0.801604	4544	-1	GACAAAACAA
D.yak	10.917	0.941262	4695	1	CCATAAAAAT
D.yak	11.239	0.951182	4871	-1	TCATAAAAAA
D.yak	7.109	0.82394	4948	-1	GCCATAAAAT
D.yak	9.239	0.889564	5150	1	GAGTTAAAAA
D.yak	7.151	0.825234	5206	1	GGATATAAAA
D.yak	7.373	0.832074	5320	-1	GAGTAATAAA
D.yak	7.525	0.836757	5453	1	GAAAATAAAA
D.yak	7.425	0.833676	5706	1	TCCCAAAAAT
D.yak	7.969	0.850436	5814	-1	CAGCAAAAAG
D.yak	9.239	0.889564	5828	-1	CCATAAAACA
D.yak	8.016	0.851884	5882	-1	GCAATAAAAC
D.yak	7.414	0.833337	7040	1	GCATAACAAT
D.yak	7.525	0.836757	7655	1	GAAAACAAAA
D.yak	9.502	0.897667	7811	1	TCATAAAAAC
D.yak	10.654	0.933159	7902	-1	GCGCAAAAAA
D.yak	9.239	0.889564	7980	-1	GCGAAAAAAG
D.yak	7.151	0.825234	8410	1	TCATAATAAA
D.yak	6.747	0.812787	8792	1	GCGCAAATAA
D.yak	6.846	0.815837	9081	1	CCGATAAAAT
D.yak	6.647	0.809706	9159	1	GACAAAAGAT
D.sec	9.069	0.884326	103	1	AGATAAAAAA
D.sec	7.373	0.832074	161	1	GAGTATAAAA
D.sec	10.239	0.920373	195	1	GAATTAAAAA
D.sec	7.747	0.843596	318	-1	GCACAAACAA
D.sec	6.724	0.812079	544	1	GAATAAAAGC
D.sec	11.461	0.958022	633	1	GAGTAAAAAA
D.sec	7.484	0.835494	985	1	CAAATAAAAT
D.sec	7.595	0.838913	1010	1	ACCTAAAAAC
D.sec	6.577	0.80755	1501	1	CAACCAAAAT
D.sec	6.747	0.812787	2538	-1	CTATAAAGAA
D.sec	7.969	0.850436	2766	1	TAACAAAAAG
D.sec	6.425	0.802867	2812	-1	TCACAAAGAT
D.sec	8.654	0.87154	2822	1	GTGTAAAAAA
D.sec	7.109	0.82394	2957	1	GGCTCAAAAA
D.sec	7.747	0.843596	2977	1	CCAAAAAGAT
D.sec	8.917	0.879643	2996	1	CCTTAAAAAA
D.sec	7.595	0.838913	3033	1	GCACAAAGAG
D.sec	9.332	0.892429	3115	-1	CCACAAAAAG
D.sec	9.554	0.899269	3137	-1	GAACAAAAAG
D.sec	7.747	0.843596	3160	1	CGACAAAAAG
D.sec	10.291	0.921975	3177	-1	GAAAAAAAAT
D.sec	9.502	0.897667	3208	-1	TCATAAAAAG
D.sec	7.332	0.830811	3243	-1	CCGGAAAAAG
D.sec	9.232	0.889348	3450	1	CACTAAAAAT
D.sec	11.613	0.962705	3469	1	GAAAAAAAAA
D.sec	10.139	0.917292	3531	-1	CAATAAAAAG
D.sec	6.694	0.811154	3586	1	GCAGTAAAAG
D.sec	6.514	0.805609	3642	1	GCATTAGAAA
D.sec	11.291	0.952784	3695	-1	GAACAAAAAA
D.sec	10.332	0.923238	3725	-1	GCACAAAAAT
D.sec	7.18	0.826128	3747	-1	CCGTAAAGAG
D.sec	10.917	0.941262	3918	-1	CCATAAAAAT
D.sec	9.121	0.885928	4065	-1	AAACAAAAAA
D.sec	9.239	0.889564	4086	-1	GCGAAAAAAG
D.sec	10.391	0.925056	4108	-1	GGAAAAAAAA
D.sec	10.239	0.920373	4161	-1	GAATTAAAAA
D.sec	8.502	0.866857	4495	-1	TCGTAAAAAC
D.sec	7.291	0.829547	4569	-1	GACAAAAACA
D.sec	10.917	0.941262	4695	1	CCATAAAAAT
D.sec	10.601	0.931526	4745	1	GCATTAAAAA
D.sec	10.028	0.913872	4785	-1	TAAAAAAAAA
D.sec	11.239	0.951182	4871	-1	TCATAAAAAA
D.sec	7.109	0.82394	4948	-1	GCCATAAAAT
D.sec	9.239	0.889564	5150	1	GAGTTAAAAA
D.sec	10.291	0.921975	5256	-1	AAATAAAAAA
D.sec	9.554	0.899269	5289	1	CAGTAAAAAT
D.sec	7.524	0.836726	5378	1	GCACCAAAAT
D.sec	10.028	0.913872	5475	-1	TAAAAAAAAA
D.sec	6.566	0.807211	5533	1	GCCAAACAAA
D.sec	7.069	0.822708	5598	1	CAAATAAAAC
D.sec	6.484	0.804684	5654	1	ATGTAAAAAA
D.sec	8.969	0.881245	5815	-1	CAACAAAAAG
D.sec	9.239	0.889564	5828	-1	CCATAAAACA
D.sec	8.016	0.851884	5882	-1	GCAATAAAAC
D.sec	6.467	0.804161	5978	-1	CAATAGAAAT
D.sec	7.414	0.833337	7040	1	GCATAACAAT
D.sec	9.502	0.897667	7464	1	TCATAAAAAC
D.sec	10.654	0.933159	7550	-1	GCGCAAAAAA
D.sec	8.917	0.879643	7632	-1	GCCAAAAAAG
D.sec	6.747	0.812787	8792	1	GCGCAAATAA
D.sec	6.846	0.815837	8923	1	CCGATAAAAT
D.sec	6.647	0.809706	9159	1	GACAAAAGAT
D.sim	9.069	0.884326	103	1	AGATAAAAAA
D.sim	7.373	0.832074	161	1	GAGTATAAAA
D.sim	10.239	0.920373	195	1	GAATTAAAAA
D.sim	6.724	0.812079	544	1	GAATAAAAGC
D.sim	11.461	0.958022	633	1	GAGTAAAAAA
D.sim	7.484	0.835494	985	1	CAAATAAAAT
D.sim	7.595	0.838913	1010	1	ACCTAAAAAC
D.sim	6.577	0.80755	1501	1	CAACCAAAAT
D.sim	6.747	0.812787	2538	-1	CTATAAAGAA
D.sim	8.969	0.881245	2686	1	AAATAAAAAT
D.sim	8.332	0.86162	2822	1	GTCTAAAAAA
D.sim	9.01	0.882508	2958	1	GCCCAAAAAT
D.sim	7.747	0.843596	2977	1	CCAAAAAGAT
D.sim	8.917	0.879643	2996	1	CCTTAAAAAA
D.sim	7.595	0.838913	3033	1	GCACAAAGAG
D.sim	9.332	0.892429	3115	-1	CCACAAAAAG
D.sim	8.806	0.876223	3137	-1	GAAACAAAAA
D.sim	7.747	0.843596	3160	1	CGACAAAAAG
D.sim	10.291	0.921975	3177	-1	GAAAAAAAAT
D.sim	9.502	0.897667	3208	-1	TCATAAAAAG
D.sim	7.332	0.830811	3234	-1	CCGGAAAAAG
D.sim	9.232	0.889348	3450	1	CACTAAAAAT
D.sim	11.613	0.962705	3469	1	GAAAAAAAAA
D.sim	10.139	0.917292	3531	-1	CAATAAAAAG
D.sim	6.694	0.811154	3586	1	GCAGTAAAAG
D.sim	11.291	0.952784	3695	-1	GAACAAAAAA
D.sim	10.332	0.923238	3725	-1	GCACAAAAAT
D.sim	10.917	0.941262	3918	-1	CCATAAAAAT
D.sim	11.291	0.952784	4065	-1	GAACAAAAAA
D.sim	9.239	0.889564	4086	-1	GCGAAAAAAG
D.sim	10.391	0.925056	4107	-1	GGAAAAAAAA
D.sim	10.239	0.920373	4161	-1	GAATTAAAAA
D.sim	8.502	0.866857	4495	-1	TCGTAAAAAC
D.sim	7.806	0.845414	4569	-1	GAGACAAAAA
D.sim	10.917	0.941262	4695	1	CCATAAAAAT
D.sim	9.654	0.90235	4745	1	CAATTAAAAA
D.sim	7.789	0.84489	4790	-1	CAATATAAAA
D.sim	11.239	0.951182	4871	-1	TCATAAAAAA
D.sim	7.109	0.82394	4948	-1	GCCATAAAAT
D.sim	9.239	0.889564	5150	1	GAGTTAAAAA
D.sim	10.291	0.921975	5256	-1	AAATAAAAAA
D.sim	7.414	0.833337	5336	1	GCATATAAAT
D.sim	9.139	0.886483	5359	-1	TAATAAAAAG
D.sim	7.524	0.836726	5378	1	GCACCAAAAT
D.sim	7.484	0.835494	5388	1	GAAACAAAAT
D.sim	9.139	0.886483	5476	-1	GATTAAAAAA
D.sim	7.069	0.822708	5706	1	TTGTAAAAAA
D.sim	7.414	0.833337	7040	1	GCATAACAAT
D.sim	9.502	0.897667	7464	1	TCATAAAAAC
D.sim	10.654	0.933159	7549	-1	GCAAAAAAAT
D.sim	8.917	0.879643	7633	-1	GCCAAAAAAG
D.sim	7.151	0.825234	8410	1	TCATAATAAA
D.sim	6.747	0.812787	8792	1	GCGCAAATAA
D.sim	6.846	0.815837	9081	1	CCGATAAAAT
D.sim	6.647	0.809706	9159	1	GACAAAAGAT
D.mel	8.969	0.881245	103	1	AAATAAAAAT
D.mel	11.461	0.958022	633	1	GAGTAAAAAA
D.mel	7.484	0.835494	985	1	CAAATAAAAT
D.mel	7.595	0.838913	1010	1	ACCTAAAAAC
D.mel	8.069	0.853517	1488	-1	TCGAAAAAAT
D.mel	6.577	0.80755	1501	1	CAACCAAAAT
D.mel	8.332	0.86162	2538	1	GAATCAAAAT
D.mel	6.747	0.812787	2538	-1	CTATAAAGAA
D.mel	7.917	0.848834	2767	-1	TCTTAAAAAA
D.mel	8.654	0.87154	2804	1	GTGTAAAAAA
D.mel	9.01	0.882508	2958	1	GCCCAAAAAT
D.mel	7.332	0.830811	2977	1	CCAAAAAGAC
D.mel	8.917	0.879643	2996	1	CCTTAAAAAA
D.mel	7.595	0.838913	3033	1	GCACAAAGAG
D.mel	9.332	0.892429	3115	-1	CCACAAAAAG
D.mel	8.806	0.876223	3129	-1	GAAACAAAAA
D.mel	7.747	0.843596	3160	1	CGACAAAAAG
D.mel	10.291	0.921975	3177	-1	GAAAAAAAAT
D.mel	9.502	0.897667	3208	-1	TCATAAAAAG
D.mel	7.332	0.830811	3234	-1	CCGGAAAAAC
D.mel	9.232	0.889348	3450	1	CACTAAAAAT
D.mel	10.391	0.925056	3467	1	CCGAAAAAAA
D.mel	10.139	0.917292	3531	-1	CAATAAAAAG
D.mel	6.694	0.811154	3586	1	GCAGTAAAAG
D.mel	6.514	0.805609	3668	1	GCATTAGAAA
D.mel	9.121	0.885928	3688	-1	AAACAAAAAA
D.mel	10.332	0.923238	3725	-1	GCACAAAAAT
D.mel	7.18	0.826128	3747	-1	CCGTAAAGAG
D.mel	8.969	0.881245	3827	-1	GAACAAAGAA
D.mel	10.917	0.941262	3918	-1	CCATAAAAAT
D.mel	11.291	0.952784	4065	-1	GAACAAAAAA
D.mel	9.239	0.889564	4086	-1	GCGAAAAAAG
D.mel	9.391	0.894247	4107	-1	GGGAAAAAAA
D.mel	10.239	0.920373	4161	-1	GAATTAAAAA
D.mel	8.502	0.866857	4495	-1	TCGTAAAAAC
D.mel	6.384	0.801604	4537	-1	GACAAAACAA
D.mel	10.917	0.941262	4695	1	CCATAAAAAT
D.mel	10.601	0.931526	4745	1	GCATTAAAAA
D.mel	7.789	0.84489	4790	-1	CAATATAAAA
D.mel	11.239	0.951182	4871	-1	TCATAAAAAA
D.mel	7.109	0.82394	4948	-1	GCCATAAAAT
D.mel	6.414	0.802528	5061	-1	CCATAGAAAC
D.mel	9.239	0.889564	5150	1	GAGTTAAAAA
D.mel	7.789	0.84489	5256	-1	CAATACAAAA
D.mel	6.817	0.814944	5359	-1	TAATAAAGAG
D.mel	11.502	0.959285	5427	-1	GCATAAAAAT
D.mel	7.069	0.822708	5470	-1	CCCAAAAACA
D.mel	6.566	0.807211	5533	1	GCCAAACAAA
D.mel	7.888	0.847941	5598	1	GCAAATAAAA
D.mel	8.654	0.87154	5654	1	GTGTAAAAAA
D.mel	8.969	0.881245	5814	-1	CAACAAAAAG
D.mel	9.239	0.889564	5828	-1	CCATAAAACA
D.mel	8.016	0.851884	5882	-1	GCAATAAAAC
D.mel	6.467	0.804161	5978	-1	CAATAGAAAT
D.mel	7.414	0.833337	7040	1	GCATAACAAT
D.mel	9.502	0.897667	7470	1	TCATAAAAAC
D.mel	10.654	0.933159	7555	-1	GCAAAAAAAT
D.mel	10.069	0.915135	7638	-1	CCAAAAAAAT
D.mel	7.151	0.825234	8410	1	TCATAATAAA
D.mel	6.747	0.812787	8792	1	GCGCAAATAA
D.mel	6.846	0.815837	9081	1	CCGATAAAAT
D.mel	6.647	0.809706	9159	1	GACAAAAGAT
Coordinates are according to a manually edited Multiz alignment of 12 Drosophila species.
Hb8 is at 4495
Hbs1 is at 4871

## Sheet: alignment_fasta
>Dmel_N003 [allele with Hb8 deleted]
agagctgcttacgtaatttgagaaagtgttgcatac---ttttgagattgcg-tttgagc
tacgttacttaca------------tttttcccacatgagtcgggcatacacatatgtaa
at-a------aaaattgggttcc--tgtatataaaat--agagtat-aaattatt-----
-------catctc---atctaacaaa------------------------tattag--aa
ataatcaa---aacacc--ttataagtttatcgaatttacgaatttac------gaattt
a----ttt-------ctacatataaatgttgaccgcca-----tttggactccacttaac
cgcttaatttgct----taagt---------aacataagtaacttt------------ta
aga-----t-----------------------------------------taatagtatt
gtattttgaatggtaaaagtccatcct----aat----------ctattgaaaaaatccc
aaggaaccaaagtcattcaaagtt--gattcaattcacccccac-cctgcgcactcagtg
ctcaatttctgctcgcagcaa---ggtctgctgagtaaaaaattagcacatcctcagcgc
agataaacgcatccttaaaa-caccccctg---gccat--cccaccagctagcca----t
ccatccatccg-------ttcatcctgcatccgcatccct---------tcgcacagaga
gc----------ggcccaattagtgctgcagtaggcatttcgaatccgtgcccacaaatc
ggctaatccgctgcca-----ctgcctgccg-------gcccagagtccaaaagtcctgt
gtgc-aatgtcc-agattt---ccgagtcgcagagtctaaatgttgacaaatacaacacc
-----------------tacgatacaaataaaattgctacagaagtaccacctaaaa---
--------------acgggca------caaccggaacgacttaattttctcaaattta--
-cagaaacatacgatgacata--------ggaatgggaatggtgatggtgatggaaac-a
----caggaagatatctcgacgccgccactgaagctgtgggtttgctcctgccgagc---
--gaatc-------------g-aacgcgagtagg-gtccc-------------attcg--
gggcc---cgagtagccagagtcctgcagctcact-------cg-aaac--------cgc
cactcaccgtggctaa-ttgcccatcaataaa-gggcccgggcagtgag------gaatt
cctccgaaagt--------------cggg-----------------tcct----------
----------------ccgttctcc----ag----------ccgaagattttttcga--g
caaccaaaatattatggtgtgccccgctgttctcgcacagtcagcgcgaatttgctgcgg
tg--agtcgatgctgtttcgcaggaccttcttc---cattt---tcg---------tct-
ccctcttg-ctcagc------------ctgtccctg------ttcctctg----------
-----cagttccctatctcctgatgcctgtgctcctttggcggcactgt-----------
-------gtcctgtcgtcg--ttgttttcctgtgatttgacatgtctgttagcagga---
---tgcctgaccctaaggccgagcccaggtctc---agtgtccactgttccactttgatg
tgattcgtcagtgcggtggactact-gctactgctctcttgcagg----actgcgtcttg
a--g--tcctg--tt-----cggctgccccctcccgtgNNNNNNNNNNNNNNNNNNNNNN
NNNNNNNNNNNNNNNNNNNNNNNNNNNNNNNNNNNNNNNNNNNNNNNNNNNNNNNNNNNN
NNNNNNNNNNNNNNNNNNNNNNNNNNNNNNNNNNNNNNNNNNNNNNNNNNNNNNNNNNNN
NNNNNNNNNNNNNNNNNNNNNNNNNNNNNNNNNNNNNNNNNNNNNNNNNNNNNNNNNNNN
NNNNNNNNNNNNNNNNNNNNNNNNNNNNNNNNNNNNNNNNNNNNNNNNNNNNNNNNNNNN
NNNNNNNNNN--------------------------------------------------
------------------------------------------------------------
------------------------------------------------------------
--------------AAAAG-----GTACCTCGATGGGTTGGTCACAATG-TGGTGGCCTC
TCAACATTGCAAGGCTCTTACTTGTGAATTATTAAGT--TATTAACTGCTGCGATGTAAG
TCATGGCAGTTTCTGTTTTCTTTATAGGATATATATAGGAAGGATTAAAGGAGGCATGTA
CAAT-------AATATGAGTATGATTTA-----GCTCAAATTCCAAATATGATGA-----
------AAGTACA-AAGCATACGATAATATAATCAAATTACGCTGACAATCACAATAATG
TTC---------------TTGTAGTAGTATTTGTG-------TAAT------------AA
TTATGTTTTTTTAAGACAAGAAACGGTAATAAAATCCA------------------CGTA
AGTGT-AAAAAATG--GACGCCCTAATCT-------ATGCCATGATGTG----TTCTACT
TT-CGAGATTTCGCCTCTG-----------------------CCCT--CATTGATGGTT-
--TCCCGGGGCTACTTGGCCCAAAAATCCCGGCCGTCCAAAAAGA------CGATCCTTA
AAAAAGAAACCGC-TAATCCTTGG----G-CCGCACAAAGAGCGGACAATCGCTC-----
--ACCTAATTATTTGG-CCGATTGTGAGGAGC--GGACAGTCGGCTCGTGGACGCTTTTT
GTGGCC--------TCTTTTTGTTT--------------CGACAAAAAGCGAGCCAATTT
TTTTTCTTTCTGGGCCACTTTGTTGCTCTTTTTATGAGTTTTTT--------CCATTGTC
AG-TTTTTCCG-GGCCTGTCTCGCAGCCC----TCGAT-------TCCCGCGATGCCTGC
CCTACAAACCTCCTAATTACGGCAGTT------------AGTCGTTGTCC-----GGGAC
AGGAGAGTAT--------------------------------GCGGAA-GGACA--TGCG
----TGCGTTTATTGCCCGCTCGAATTTCCACTAAAAATTGGGCCGG-AAAAAAAACAAC
TAGGTAG-------GACTA--GGAACTGCAAACTAGCAAAGCGGACGCGCCTTTTTATTG
GTGCACCTTCGGCGGA---------------ACCGCAGGATAACAGCAGTAAAAGCGACG
ACGAGGACAC-----------AAGGATCCTCGAAATCG---------------AGAGCGA
CCTCGCTGCATTAGAAAAC-------TAGATCAGTTTTTTG---------TTTTGG-CCG
GCCGATTTTTGTGCCCG----GTGCTCTCTTTACGG--------TTTATGGCCGCGTTCC
-----------------------------------CATTTCCCAGCTTCTTTGTT---CC
GGGCTCAGAAATCTGTAT-GGAA-TTAT--------------------------------
-GG-----TATATGCAGATTTTTATGGGT--CCCGGC--GATCCGG--------TTCGCG
GAA--------------CGGGAGTGTCCTGCCGCGAGAGGTCCTCGCCGGCGATCCTTGT
--------------CGCCCGTA-TTAGGAAAGTAGATCACG---TTTTTTGTTCCCATTG
TGCGCTTTTTTC-GCTGCGCTA-G--TTTTTTTCCCCGAACC----------CAGCG---
--------AACTGCTCTAATTTTTTAATTCTTCACGGCTTTTCATTGGG--------CT-
-CCTGGAAAAA-------CG--CGG-----------------------------------
---ACAAGGTTATAAC--------------------------------------------
---------GCTCTACT------------TACCTG-CAATTGTGGCCATAACTCGCAC--
--------------TGCT---CT-CGTTTTTAAG---------ATCCGTTTGTT------
----TGTGTT----------TG-----TTTGTCCG------CGATGGCATTCACGTTTTT
ACGAGCTCGT----------TCCTTCGG----------GTCCAACCATGTCCAGAATTAT
GCCAGTTTG-TTTTGTCTCTGGC------------AATTATTGGAAATTTCATTGGGTCG
ATT------------------------TCGCTGCCTTCCTTGCTCTTCCCTCGGG-AAAA
GTGAATAGGTTGTGCCATAAAAATCgctgctcctgaagaccaaatgaaatggatttgt-g
taagc-attaaaaacgcgaggcaagccccaagattcctccactg-ctttttttatattgc
ccactgctaaatgcagctaattc----------gtcgattgtctgaaaagcgttctacaa
gctgaagcacttttttatgatg---------tttgctagaaaattaaattacttatgttg
ccattcata-----cat--cccctcacattttatggccatttga--gtgcggggtgcaca
--gttctgtCTTAAGTGGCGGATGGAAACCAC-----CACATTTACTCGAG-----GGAT
GATGTGCT--------------CTAATATCTCCTCATCAAAT------GGGATGGT----
-TTCT--------ATGGAAA----GGCAAAATCGTTGTACAGTGAGGCGGAGTTAAAAA-
--ATACC----TTGTTA-------TAGCCTTTTTAAAATAACACAAGAT-----------
-----CGTTCGAATTGACTAGAAATATCAAAGTCTTTTTGTATTGAAGCGAGTGT-----
---------AGT---------CTCAATTTAT----GCTTAATT-----------------
----TTAAGAA-ATACATCTCTTTAT---------TAGCCCCAAAATGA--AAC-AAATG
GTCTACTAATTAAGCAAGTCAACAGAATTTTTATGCAATTA-TTCAAAAT---GAAATAA
TATATACATA--AGATGTTTTTG------GGAATCTGTCATG---GGGTTTC----TGAA
ATAGGTTT----GCCAAACAAATTTTAAGTA---TAAATGTATA-----CATATG--TCA
A---CTAATAAAT-TTAGCAAATAAAAT---GTACCTGCAAGT---AT-CTATAAATTTA
TTGGACCAATTTTGTGTAAAAAACTGAACTGGCAC------------TCTT---------
------CCCAAGAATG-----------GGACTTCGAGGACTCCT----TGCTGAATCACT
TACTCAACCCATTCCAACTCATCcaatccgcgcaatcatcataaatt-ttggcctttttg
ttgtaattgttttatggcagaaattactcaatcatca-agcataattccctcgttttcgc
cgttttattgccaatttttgcac--tgcct-ttgccttt-----ttcccGCCCT-----T
TCCTCAGCGTTTTGCGAATCTTTGCCG--------GCATTTCTATTGCGCGGACAA----
--------------------TCCGGCTAGTGTGT-TGGCCATTTACTTGCCATGATGACG
GGCATAATCAGCGA-----GATCGGCGCTTTG--TGAGTGCA-GAATGTGCAATAAAGCG
GCAACA--------ATCGGCAGGG-ATTCGCCTTC----------CCATATTCCGGGTAT
TGCCG----GCCCGG-------------------------------------GAAAATGC
--GAAAGTGTTT---GCG-------G-------------ATCGAGATGGAA-----GAT-
-----------AGAGGATTGAGTATT---GAAAAGA------GGCAGGTAC---------
----TTCCGCCGG-CG---GACACTTTCGCCTA-AC--CAAGCCAATCCAACCCATCCCA
A----------TCCAA---TCCAACCCACCCGATCGCCATAAAGGGTATTTACTGTCGCT
GCCGCAGAGCC--------------------TCGCTTGA----------CGACTTAACCC
AAGCGGTCGTTTCGCGTC---------CATTCTC--------CGG---------------
-----------ACGG-AGTCAAA--GACAAAGGCCGGCGGAGGTGGACAATAGGCAAGGT
TGTTGCTTGTGGGTAGGGTTTGAGCT--A--TGAGCTGTGAGCTGTGAG--TTGTTAGCC
CTGAACCCCGAACCTCGAGA-------ATTGAACCT-------TTCCCGGGGCAAG-AA-
GGCTTGCATGTGGGCCTTTTCCAGGTCG-GCcagtaggtagag-ttgttgc-gatgcggc
TATGCCGGGCGAGTTAATGCCAATGCAAATTGCGGGCGCAATATAACCCAATAATTTGAA
GTAACTGG------------------------------------C--AGGAGCGAG----
------------G----------------------TATCCTTCCTG------G-------
--TTACCCG-----GTACTGCATAACAATGGA----------ACCCGAACCGTAACTGGG
A---------------C----------------------------AGATCGA---AAAGC
TGGCCTGGT----------TTCTCG--------CTGTGT---------------------
GTGCCGT-------------------GTTAATCCG-TTTGCCATCAGCGAGATTATTAGT
CAA-----------------------TTGCAGTTG-------------------------
-------------CAGCGTTTCGCTT---TCGTCCTCGTTTCACTTT-------------
----------------------------------------------CGAGTTAGACTTTA
TTGCAGCATCTTG----AACAATCGTC---------------------------------
-----------GCA-GTTTGGTAACACGCTG---------TGC---------CAT-----
---------------ACTTTC-------------------ATTTAGACGGAAT-CGAGGG
ACCCTGGACTAT-----AATCGCACAACGA------------------GACC--GGGTTG
-----CGAAGTCA----GGGCATTCCG------CCGATCTA------GCCATCGCCATCT
TCTGCGGGC-------GTTTGTTTGTTTGTTT--GCTGGGATTA----------GCC-AA
GGGCTTGACTTGGAATCCA-----------------------------------------
-ATCCCGATCCCTAGCCCGATCCCA------------------ATCCCAATCCCAATCCC
--TTGTCCTTTTCATTAGAAAGTCATAAAA-ACACATAATAAT--GATGTCGAAGGGATT
AGG-----GGCGCG-----CAGGTC----------CAGGCAACGCAATTAACGGACTAGC
-GAACTGGGTTATTTT-----------TTTGC-------------------------GCC
GA-----------CTTAGCCCTGATCCGCGAGCTTAACCCGTTTTGAGCCGGGC------
AGCAGGTAG------------------TTG-TGGGTGGAC----------CCCACG----
-------------------------ACTTTT---TTGGCCCAA--------------CCT
CCAAGCTAACTTGcg--caagtggcaagtggccggtttgctggcccaaaaga--------
----------ggaggcactatcccggtcctggt-acagttg-gta-cgctggg---aatg
attatatcatcataataaatgttttgcccaacgaaaccga-------aaacttttcaaat
taagtcccggcaaCTGGGTTCCC-AT--------------TTTC----------------
-------------------CATTT-TCCATGT-TCT--GCGGCCAGGGGCG---------
---------------------------GCCATTATC-TCACTACAGCA-------GTTCC
CAAATGGTTATGGCTGGACACCCCT------GCCGCCGCT-CCAACG-GGGTGGATGAAG
CCCCCAAAACCCGAAAG-TCATGGCAGCCATGG--------CAGTGTGGGGCTGTTAAAC
GTGCGGC--ATAATATTAAGACTTCATAAAAGCGCAAATAATTC-GCT-GGCA--GGC--
-GATCGATAA-----------------------TACA-----------TACATACAAATA
TATAG----------TGGGATACACA------------CACTCTCTG-------CCGGCA
AACACACACCACCC----------GACC--------------------------------
-------------CGACTGAGCG-----------------------GCATAATGCCATAT
CATTCT------TGATGAAGCCGATAAAATCCCATTATTAAGGGGGC-CCG-CCCGTCCC
GCTCGCTCCTGCGGAGCAACC-GCCTGCGGGCGGGCGAGACAAAAGATTCGCTCATCCGC
TATGAATACC--AAATCGGAAC------TCTCTCTC----TCTCT---------------
---------CCAGCTCGGGA------GTGC---------CA--TGGCCAGCATGGCCAGG
ACCTCCTCATGGTCCTGCCGA-GCAGAGAACGCG
>dm3 [refernce genome with Hbs1 deleted].
AGAGCTGCTTACGTAATTTGAGAAAGTGTTGCATAC---TTTTGAGATTGCG-TTTGAGC
TACGTTACTTACA------------TTTTTCCCACATGAGTCGGGCATACACATATGTAA
AT-A------AAAATTGGGTTCA-CTGTATATAAAAT--AGAGTAT-AAATTATT-----
-------CATCTT---ATCTAACAAA------------------------TATTAG--AA
ATAATCAA---AACACC--TTATAAGTTTATCGAATTTACGAATTTAC------GAATTT
A----TTT-------CTACATATAAATGTTGACCGCCA-----TTTGGACTCCACTTAAC
CGCTTAATTTGCT----TAAGT---------AACATAAGTAACTTT------------TA
AGA-----T-----------------------------------------TAATAGTATT
GTATTTTGAATGGTAAAAGTCCATCCT----AAT----------CTATTGAAAAAATCCG
AAGGAACCAAAGTCATTCAAAGT-T-GATTCAATTCACCCCCAC-CCTGCGCACTCAGTG
CTCAATTTCTGCTCGCAGCAA---GGTCTGCTGAGTAAAAAATTAGCACATCCTCAGCGC
AGATAAACGCATCCTTAAAA-CACCCCCTG---GCCAT--CCCACAAGCTAGCCA----T
CCATCCATCCG-------TTCATCCTGCATCCGCATCCCT---------TCGCACAGAGA
GC----------GGCCCAATTAGTGCTGCAGTAGGCATTTCGAATCCGTACCCACAAATC
GGCTAATCCGCTGCCA-----CTGCCTGCCG-------GCCCAGAGTCCAAAAGTCCTGT
GTGC-AATGTCC-AGATTT---CCGAGTCGCAGAGTCTAAATGTTGACAAATACAACACC
-----------------TACGATACAAATAAAATTGCTACAGAAGTACCACCTAAAA---
--------------ACGGGCA------CAACCGGAACGACTTAATTTTCTCAAATTTA--
-CAGAAACAGACGATGACATA--------GGAATGGGAATGGTGATGGTGATGGAAAC-A
----CAGGAAGATATCTCGACGCCGCCACTGAAGCTGTGGGTTTGCTCCTGCCGAGC---
--GAATC-------------C-AACGCGAGTAGG-GTCCC-------------ATTCG--
GGGCC---CGAGTAGCCAGAGTCCTGCAGCTCACT-------CG-AAAC--------CGC
CACTCACCGTGGCTAA-TTGCCCATCAATAAA-GGGCCCGGGCAGTGAG------GAATT
CCTCCGAAAGT--------------CGGG-----------------TCCT----------
----------------CCGTTCTCC----AG----------CCGAAGATTTTTTCGA--G
CAACCAAAATATTATGGTGTGCCCCGCTGTTCTCGCACAGTCAGCGCGAATTTGCTGCGG
TG--AGTCGATGCTGTTTCGCAGGACCTTCTTC---CATTT---TCG---------TCT-
CCCTCTTG-CTCAGC------------CTGTCCCTG------TTCCTCTG----------
-----CAGTTCCCTATCTCCTGATGCCTGTGCTCCTTTGGCGGCACTGT-----------
-------GTCCTGTCGTCG--TTGTTTTCCTGTGATTTGACATGTCTGTTAGCAGGA---
---TGCCTGACCCTGAGGCCGAGCCCTGGTCTC---AGTGTCCACTGTTCCACTTTGATG
TGATTCGTCAGTGCGGTGGACTACT-GCTACTGCTCTCTTGCTGG----ACTGCGTCTTG
A--G--TCCTG--TT-----CGGCTGCCC-------------------------------
--------CCTCCCGTGA---------------CCTCTGACCCTGCAC------------
TCTG------CGGCTTTCCAGCGGCGTTTGTTGGCGAATCT--GACCCC-----------
--------------GAGCTCCTGCTGCTCCTTCGCT--------------CCTTCGCTCC
TTCTCCGC---ATCTCCGCTCTT----TGGA---------------------------C-
--TTCG--TACGAATCAAAATTGGTCACAGCA-------CCGAGTGA------ATTGCCC
CGGAGACCGCAATGCGCTGTATTTATAGTAAACGTGTCCGATTGATTTGGCCACCCGTGG
CGGCT----------CTGTCACAGATGCC---------TCAATTTGCATCTATCGAATGG
TTTACATGGCTCTAAAAAG-----GTACCTCGATGGGTTGGTCACAATG-TGGTGGCCTC
TCAACATTGCAAGGCTCTTACTTGTGAATTATTAAGT--TATTAACTGCTGCGATGTAAG
TCATGGCAGTTTCTGTTTTCTTTATAGGATATATATAGGAAGGATTAAAGGAGGCATGTA
CAAT-------AATATGAGTATGATTTA-----GCTCAAAT----TCCAAATAT------
GATAAAA-GTACA-AAGCATACGATAATATAATCAAATTACGCTGACAATCACGATAATG
--TTC-------------TTGTAGTAGTATTTGTG-------TAAT------------AT
TTATGTTTTTTTAAGATAAGAAACGGTAATAAAATCCA------------------CGTA
AGTGT-AAAAAATG--GATGCCCTAATCT-------ATGCCATGATGTG----TTCTACT
TT-CGAGATTTCGCCTCTG-----------------------CCCT--CATTGATGGTT-
--TCCCGGGGCTACTTGGCCCAAAAATCCCGGCCGTCCAAAAAGA------CGATCCTTA
AAAAAGAAACCGC-TAATCATTGG----G-CCGCACAAAGAGCGGACAATCGCTC-----
--ACCTAATTATTTGGCCCGATTGTGAGGAGC--GGACAGTCGGCTCGTGGACGCTTTTT
GTGGCC--------TCTTTTTG-TT-------------TCGACAAAAAGCGAGCCAATTT
TTTTTCTTTCTGGGCCACTTTGTTGCTCTTTTTATGAGTTTTTT--------CCATTGTC
AG-TTTTTCCG-GGCCTGTCTCGCAGCCC----TCGAT-------TCCCGCGATGCCTGC
CCTACAAACCTCCTAATTACGGCAGTT------------AGTCGTTGTCC-----GGGAC
AGGAGAGTAT--------------------------------GCGGAA-GGACA--TGCG
----TGAGTTTATTGCCCGCTCGAATTTCCACTAAAAATTGGGCCGAA-AAAAAAACAAC
TAGGTAG-------GACTA--GGAACTGCAAACTAGCAAAGCGGACGCGCCTTTTTATTG
GTGCACCTTCGGCGGA---------------ACCGCAGGATAACAGCAGTAAAAGCGACG
ACGAGGACAC-----------AAGGATCCTCGAAATCG-AG------------AGCGACC
TCG-CTGC-ATTAGAAAAC-------TAGATCAGTTTTTTG---------TTTTG-GCCG
ACCGATTTTTGTGCCCG-G---TGCTCTCTTTACG--------GTTTATGGCCGCGTTCC
-----------------------------------CATTTCCCAGCTTCTTTGTT---CC
GGGCTCAGAAATCTGTAT-GGAA-TTAT--------------------------------
-GG-----TATATGCAGATTTTTATGGGT--CCCGGC--GATCCGG--------TTCGC-
GGA-----------ACGG--GAGTGTCCTGCCGCGAGAGGTCCTCGCCGGCGATCCTTGT
------------CGC-CCGTA--TTAGGAAAGTAGATCACG---TTTTTTGTTCCCATTG
TGCGCTTTTTTC-GCTGCGCTA-G--TTTTTTTCCCCGAACC----------CAGCG---
--------AACTGCTCTAATTTTTTAATTCTTCACGGCTTTTCATTGGG--------CT-
-CCTGGAAAAA-------CG--CGG-----------------------------------
---ACAAGGTTATAAC--------------------------------------------
---------GCTCTACT------------TACCTG-CAATTGTGGCCATAACTCGCAC--
--------------TGCT---CT-CGTTTTTAAG---------ATCCGTTTGTT------
----TGTGTT----------TG-----TTTGTCCG------CGATGGCATTCACGTTTTT
ACGAGCTCGT----------TCCTTCGG----------GTCCAA----------AATTAT
GCCAGTTTG-TTTTGT------CTCTGG------CAATTATTGGAAATTTCATTGGGTCG
ATT------------------------TCGCTGCCTTCCTTGCTCTTCCCTTGAG-AAAA
GTGAATAGGTTGTGCCATAAAAATCGCTGCTCCTGAAGACCAAATGAAATGGATTTGT-G
TAAGC-ATTAAAAACGCGAGGCAAGCCCCAAGATTCCTCCACTG-CTTTTTTTATATTGC
CCACTGCTAAATGCAGCTAATTC----------GTCGATTGTTT----------------
--------------------------------------AAAAATTAAATTACTTATGTTG
CCATTCATA-----CAT--CCCCTCACATTTTATGGCCATTTGA--GTGCGGGGTGCACA
--GTTCTGTCTTAAGTGGCGGATGGAAACCAC-----CACATTTACTCGAG-----GGAT
GATGTGCT--------------CTAATATCTCCTCATCAAAT------GGGATGGT----
-TTCT--------ATGGAAA----GGCAAAATCGTTGTAAAGTGAGGCGGAGTTAAAAA-
--ATACC----TTGTTA-------TAGCCTTTTTAAAATAACACAAGAT-----------
-----CGTTCGAATTGACTAGAAATATCAAAGTCTTTTTGTATTGAAGCGAGTGT-----
---------AGT---------CTCAATTTAT----GCTTAATT-----------------
----TTAAGAA-ATACATCTCTTTAT---------TAGCCCCAAAATGA--AAC-AAATG
GTCTACTAATTAAGCAAGTCAACAGAATTTTTATGCAATTA-TTCAAAAT---GAAATAA
TATATACATA--AGATGTTTTTG------GGAATCTGTCATG---GGGTTTC----TGAA
ATAGGTTT----GCCAAACAAATTTTAAGTA---TAAATGTATA-----CATATG--TCA
A---CTAATAAAT-TTAGCAAATAAAAT---GTACCTGCAAGT---AT-CTATAAATTTA
TTGGACCAATTTTGTGTAAAAAACTGAACTGGCAC------------TCTT---------
------CCCAAGAATG-----------GGACTTCGAGGACTCCT----TGCTGAATCACT
TACTCAACCCATTCCAACTCATCCAATCCGCGCAATCATCATAAATT-TTGGCCTTTTTG
TTGTAATTGTTTTATGGCAGAAATTACTCAATCATCA-AGCATAATTCCCTCGTTTTCGC
CGTTTTATTGCCAATTTTTGCAC--TGCCT-TTGCCTTT-----TTCCCGCCCT-----T
TCCTCAGCGTTTTGCGAATCTTTGCCG--------GCATTTCTATTGCGCGGACAA----
--------------------TCCGGCCAGTGTGT-TGGCCATTTACTTGCCATGATGACG
GGCATAATCAGCGA-----GATCGGCGCTTTG--TGAGTGCA-GAATGTGCAATAAAGCG
GCAACA--------ATCGGCAGGG-ATTCGCCTTC----------CCATATTCCGGGTAT
TGCCG----GCCCGG-------------------------------------GAAAATGC
--GAAAGTGTTT---GCG-------G-------------ATCGAGATGGAA-----GAT-
-----------AGAGGATTGAGTATT---GAAACGA------GGAAGGTAC---------
----TTCCGCCGG-CG---GACACTTTCGCCTA-Ac--caagccaatccaacccatccca
a----------tccaa---tccaacccaCCCGATCGCCATAAAGGGTATTTACTGTCGCT
GCCGCAGAGCC--------------------TCGCTTGA----------CGACTTAACCC
AAGCGGTCGTTTCGCGTC---------CATTCTC--------CGG---------------
-----------ACGG-AGTCAAA--GACAAAGGCCGGCGGAGGTGGACAATAGGCAAGGT
TGTTGCTTGTGGGTAGGGTTTGAGCT--A--TGAGCTATGAGCTGTGAG--CTGTTAGCC
CTGAACCCCGAACCTCGAGA-------ATTGAACCT-------TTCCCGGGGCAAG-AA-
GGCTTGCATGTGGGCCTTTTCCAGGTCG-GCCAGTAGGTAGAG-TTGTTGC-GATGCGGC
TATGCCGGGCGAGTTAATGCCAATGCAAATTGCGGGCGCAATATAACCCAATAATTTGAA
GTAACTGG------------------------------------C--AGGAGCGAG----
------------G----------------------TATCCTTCCTG------G-------
--TTACCCG-----GTACTGCATAACAATGGA----------ACCCGAACCGTAACTGGG
A---------------C----------------------------AGATCGA---AAAGC
TGGCCTGGT----------TTCTCG--------CTGTGT---------------------
GTGCCGT-------------------GTTAATCCG-TTTGCCATCAGCGAGATTATTAGT
CAA-----------------------TTGCAGTTG-------------------------
-------------CAGCGTTTCGCTT---TCGTCCTCGTTTCACTTT-------------
----------------------------------------------CGAGTTAGACTTTA
TTGCAGCATCTTG----AACAATCGTC---------------------------------
-----------GCA-GTTTGGTAACACGCTG---------TGC---------CAT-----
---------------ACTTTC-------------------ATTTAGACGGAAT-CGAGGG
ACCCTGGACTAT-----AATCGCACAACGA------------------GACC--GGGTTG
-----CGAAGTCA----GGGCATTCCG------CCGATCTA------GCCATCGCCATCT
TCTGCGGGC-------GTTTGTTTGTTTGTTT--GCTGGGATTA----------GCC-AA
GGGCTTGACTTGGAATcca-----------------------------------------
-atcccgatccctagcccgatccca------------------atcccaatcccaatccc
--TTGTCCTTTTCATTAGAAAGTCATAAAA-ACACATAATAAT--GATGTCGAAGGGATT
AGG-----GGCGCG-----CAGGTC----------CAGGCAACGCAATTAACGGACTAGC
-GAACTGGGTTATTTT-----------TTTGC-------------------------GCC
GA-----------CTTAGCCCTGATCCGCGAGCTTAACCCGTTTTGAGCCGGGC------
AGCAGGTAG------------------TTG-TGGGTGGAC----------CCCACG----
-------------------------ATTTTT---TTGGCCAAA--------------CCT
CCAAGCTAACTTGCG--CAAGTGGCAAGTGGCCGGTTTGCTGGCCCAAAAGA--------
----------GGAGGCACTATCCCGGTCCTGGT-ACAGTTG-GTA-CGCTGGG---AATG
ATTATATCATCATAATAAATGTTTTGCCCAACGAAACCGA-------AAACTTTTCAAAT
TAAGTCCCGGCAACTGGGTTCCC-AT--------------TTTC----------------
-------------------CATTT-TCCATGT-TCT--GCGGGCAGGGGCG---------
---------------------------GCCATTATC-TCGCTACAGCA-------GTTCC
CAAATGGTTATGGCTGGACACCCCT------GCCGCCGCT-CCAACG-GGGTGGATGAAG
CCCCCAAAACCCGAAAG-TCATGGCAGCCATGG--------CAGTGTGGGGCTGTTAAAC
GTGCGGC--ATAATATTAAGACTTCATAAAAGCGCAAATAATTC-GCT-GGCA--GGC--
-GATCGATAA-----------------------TACA-----------TACATACAAATA
TATAG----------TGGGATACACA------------CACTCTCTG-------CCGGCA
AACACACACCACCC----------GACC--------------------------------
-------------CGACTGAGCG-----------------------GCATAATGCCATAT
CATTCT------TGATGAAGCCGATAAAATCCCATTATTAAGGGGGC-CCG-CCCGTCCC
GCTCGCTCCTGCGGAGCAACC-GCCTGCGGGCGGGCGAGACAAAAGATTCGCTCATCCGC
TATGAATACC--AAATCGGAAC------TCTCTCTC----TCTCC---------------
-----------AGCTCGGGA------GTGC---------CA--TGGCCAGCATGGCCAGG
ACCTCCTCATGGTCCTGCCGA-GCAGAGAACGCG
>droSim1 .
AGAGCGGCTTACGTTATTTGAAAAAGTGTTGCATAC---TTTTGAGATTGCG-TTTAAGC
TACGTTACTTACA------------TATTTTCCACATGACACGGGCATACACCAATGTAG
AT-AA-----AAAATTTGCTTCA-ATGTATATACAAT--CGAGTATAAAATTATT-----
-------CACATGGGAATTAAAAAAA-----CC-TGCTATGTAAGA----TTTTAC--AA
ATTATCAA---AACCTC--TAATAACTTTGT----------------C------TAATTT
A----TTT-------CTACATAGAACTGTTAAGAGCCA-----TTTGGTTACTATTTAAC
TCCTTTATTTGCTTATGTATGTATGT--ACTTACATACGTAATTAT------------TA
AAA-----T-----------------------------------------TAATA-----
GTATCTTGAATTGTAAAAGCCCATCCT----AAACGCTTT----CTATTGAAAAACGCTC
AAGGAATAAAAGCCATTCAACGA-T-GATTCAATTCACCCCCAG-CCTGCGCACTCAGTG
CTCACTTTCTGCTCGCAGCAA---GGTCTGCTGAGTAAAAAATTAGCACATCCTCAGCGC
TGATAAACGCATCCTTAAAA-CACCCCCTG---CCCAT--CCCA----CCAGCCA----G
GCAACCATCCG-------TCCATCCTGCATCCGCATCCCT---------TCGCACAGAGA
GC----------GGCCCAATTAGTGCTGCAGTAGGCATTTCGAATCCGTGCCCACAAATC
GGCTAATCCGCTGCCA-----CTGCCTGCCGTTCCAGAGTCCAGAGTCCAAAAGTCCTGT
GTGC-AATGTCC-AGATTT---CCGAGTCGCAGAGTCTAAATGTTGACAAATACAACACC
-----------------TACGATACAAATAAAATTGCTACAGAAGTACCACCTAAAA---
--------------ACGGGCA------CAACCGGAACGACTTAATTTTCTCAAATTTA--
-CAGAAACAGACGATGACATA--------GGAATGGGAATGGAAATGGTGATGGAAAC-A
----CAGGAAGATATCTCGACGCCGCCACTGAAGCTGTGGGTTTGCTCCTGCCGAGC---
--GAATC-------------C-AACGCGAGTAGG-GTCCC-------------ATTCG--
GGGCC---GGAGTAGCCAGAGTCCTGCAGCTCACT-------CG-AAAC--------CGC
CACTCACCGTGGCTAA-TTGCCCATCAATAAA-GGGCCCGGGCAGCGAG------GAATT
CCTCCGAAAGC--------------CGGG-----------------TCCT----------
----------------CCGTTCTCC----AG----------CCGAAGATTTCCTCGA--G
CAACCAAAATATTATGGTGTGCCCCGCTGTTCTCGCACAGTCAGCGCGAATTTGCTGCGG
TG--AGTCGATGCTGTTTCGCAGGACCTTCTTC---CCTTT---TCC---------TCT-
CCCTCTTG-CTCTGG------------CCGTCCCTG------TTCCTCTG----------
-----CAGTTCCTT---------------TGCTCCTTTGGCGGCACTGT-----------
-------GTCCTGTCGTCG--TTGTTTTCCTGTGATTTGACATGTCTGTTAGCAGGA---
---TGCCTGACCCTGAGGCCGAGTCCTGGACTC---AGTGTCCACTGTTCCACTTTGATG
TGATTCGTCAGTGCGGTGGACTACT-GCTACTGCTCTCTTGCAGG----ACTGCGTCTTG
A--G--TCCTG--TT-----CGGCTGCCC-------------------------------
--------CCTCCCGCGA---------------CCTCTGACCCTGCAC------------
TCTG------CGGCTTTCCAGCGGCGTTTGTTGGCGAATCT--GACCCC-----------
--------------GAGCTCCTGCTGCTCCTTCGCT--------------CCT-------
------------TCTCCGCTCTT----TGGC---------------------------C-
--TTCG--CCCGAATCGAAATTGGTCACAGCT-------CCGAGTGA------ATTGCCC
CGGAGACCGCAATGCGCTGTATTTATAGTAAACGTGTCCGATTGATTTGGCCACCCGTGG
CGGCT----------CTGTCACAGATGCC---------TCAATTTGCATCTATCAAATGG
TTTACATGGCTCTAAAAAG-----GTCCCTCGATGGGTCG---CCAATGTTGGTGGCTTC
TCAACATTGCGAGGCTCTTACTTGTGAATTATTAAAT----GTAACTACAGCGATATAAG
TCATGGCAGTTTCTGTTTTCTTTATAGGAGGTA---------ACTTAA------CATG--
---T-------AATTTGAATACCAACGA-----GCTCAAGT----TGCAAATAT------
GAATAAA-GTATG-TATATTAC----ACATGATCAAATTTAGCTGGCAATCATGATAATG
--TTCCTG-GTTAACTCGTTGTATTATCCTTTCTCAAAA---TAAA------AATCAGAT
ATGTGCAACAACAAGTTAAGGAATGGTAATAAAATCAAATTAATTAGAATTATCTTCGTG
AGTCTAAAAAAATG--GAAA---TAATCT-------ATGCCAAGATGTG----TCCTACT
TT--GAGATTTCGCCCCTG-----------------------CCCT--CATTGATGGTT-
--TCCCGGGGCTACTTGGCCCAAAAATCCCGGCCGTCCAAAAAGA------TGATCCTTA
AAAAAGAAACCGC-TAATCATTGG----G-CCGCACAAAGAGCGGACAATCGCTC-----
--ACCTAATTATTTGGCCCGATTGTGAGGAGC--GGACAGTCGGCTCGTGGACGCTTTTT
GTGGCC--------TCTTTTTG-TT-------------TCGACAAAAAGCGAGCCAATTT
TTTTTCTTTCTGGGCCACTTTGTTGCTCTTTTTATGAGTTTTTT--------CCATTGTC
AC-TTTTTCCG-GGCCTGCCCAGCAGCCC----TCGAT-------TCCCGCGATGCCTGC
CCTACAAACCTCCTAATTACGGCAGTT------------AGTCGTTGTCC------GGAC
AGGAGAATAT--------------------------------GCGGAA-GGACA--TGCG
----TGCGTTTATTGCCCGCTCGAATTTCCACTAAAAATTGGGCCGGA-AAAAAAAAAAC
TAGGTAG-------GACTA--GGAACTGGAAACTAGCAAAGCGGACGCGCCTTTTTATTG
GTGCACCTTCGGCAGA---------------ACCGCAGGATAACAGCAGTAAAAGCGACG
ACGAGGACAC-----------AAGGATCCTCGAAATCG-AG------------AGCGACC
TCG-CTGC-ATTAGAAAAC-------TAGATCAGTTTTTTG---------TTCTG-GCCG
GCCGATTTTTGTGCCCG-G---TGCTCTCTTTACG--------GTTTATGGCCCCGTTCC
-----------------------------------CATTTCCCAGCTCCTTTGTT---CC
GGGCTCAGAAATCTGTAT-GGAA-TTAT--------------------------------
-GG-----TATATGCAGATTTTTATGGGT--CCCGGC--GATCCGG--------TTCGC-
GGA-----------ACGG--GAGTGTCCTGCCGCGAGCGGTCCTCGCCGGCGATCCTTGT
------------CGC-CCGTA--TTAGGAAAGTAGATCACG---TTTTTTGTTCCCATTG
TGCGCTTTTTTC-GCTGCGCTAGT--TTTTTTTCCCCGAACC----------CAGCG---
--------AACTGCTCTAATTTTTTAATTCTTCACGGCTTTTCATTGGG--------CT-
-CCTGGAAAAA-------CG--CGG-----------------------------------
---ACAAGGTTATAGC--------------------------------------------
---------GCTCTACT------------TACCTG-TAATGGTGGCCATAACTCGCAC--
--------------TGCT---CT-CGTTTTTAAG---------ATCC----GTT------
----TGTGTT----------TG-----TTTGTCCG------------------CGTTTTT
ACGAGCTCGT----------TCCTTCGGTTCCAACCATGTCCAA----------AATTAT
GCCAGTTTGTTTTTGT------CTCTGG------CAATTATTGGAAATTTCATTGGGTCG
ATTG---------------GGTCGATGTCGCTGCCTTCCTTCCTCTTCCCTCGGG-AAAA
GTGAATAGGTTGTGCCATAAAAATCGCTGCTCCTGGAGACCAGA-GAAATGGATTTGT-G
TAAGCAATTAAAAATGCGAGGCAAGCCCCAAGATTCCTCCACTG-CTTTTTTTATATTGC
CCACTGCTAAATGCAGCTAATTC----------GTCGATTGTCTGAAAAGCGTTCTTCAA
GCTGAAGCACTTTTTTATGATG---------TTTGCTAGAAAATTAAATTACTTATCTTG
CCATTCATA-----CAT-CCCCCTCACATTTTATGGCCATTTGA--GTGCGGGGTGCAAA
--GTTCTGTCTTAAGTGGCGGATGGAAACCAC-----CACATTTACTCGAG-----GGAT
GATGTGCT--------------CTAATACCTCCTCATCAAAT------GGGTTGGTCTCT
ACTCT--------ATGGCAG----GGCAAAATCTTTGTAAAATGAGGCGGAGTTAAAAA-
-CATACC----ATGTTA-------TAGCC-TTTTGAAATATTACAAGAT-----------
-----TGTTAGAATTGTCTGGAAATGTCAATATCCTTTTTTATTTAAGCGTGTGT-----
---------AGT---------CTCAATATAT----GCTTATTTAAGCTTAAATGCGCATA
TAAATTAATAAAGTATACCTTTTTAT---------TAGCACCAAAATGA--AACAAAATG
GTATAGTAATTTAGCAAGTCAACAGATTATTTAAGCTTTTA-GTCAAAAT---GAAATAA
TATATATGTG--CGTATTTTTTT------AA-----------------------------
------------------------------------------------------------
------------------------------------------------------------
-----------------------------------------------TCAT---------
------TGTAAAAAAG-----------GGGCTTCCAAGAGGATGAGATCGGTGGATCATT
---TCTAACCACCC--ACTCATC--ATCGGC---ATCATCATAA----TTAGTCTTTGTG
TAATGGTTAT---------GAGAATAATC-ATCATCA-AGCATAAT--CCTCG--TTCGC
CGTTT--ATGCCA--TTTTGCAC--TGCCT-TG--CCTC-----TTCCCGCC-------T
CCCTCAGCG-TTTGCGAATC-TCGCCG--------GCA-TTCTA-TGCGC-GACAA----
--------------------TCCGG-CAGTGTG--TGGCCA-TTACTTGCCATGATGACG
GGCATAATCAGCGA-----GATCGGCGCTTTG--TGAGTGCA-GAATGTGCAATAAAGCG
GCAACA--------ATCGGCAGGG-ATTCGCCTTC----------CCGTATTCCGGGTAT
TGCCG----GCCCGG-------------------------------------GAAAATGC
--GAAAGTGTTT---GCG-------GATCGCAAACG-GTATCGAGATGGTA-----GAT-
-----------AGAGGA-TGAGTATT---CAACAGA------GGCAGGTAC---------
----TTCCGCGGC-CG---GACACTTTCGCCTA-Ac--caagccagtccaacccatccca
a----------tccaa---tccaacccaCCCGATCGCCATAAAGGGTATTTACTGTCGCT
GCCGCAGAGCC--------------------TCGCTTGA----------CGACTTAACCC
AAGCGGTCGTTTCGCGTC---------CATTCTC--------CGG---------------
-----------ACGG-AGTCAAA--GACAAAGGCCGGCGGAGGTGGACAATAGGCAAGGT
TGTTGCTTGTGGGTAGGGTT-----------TGAGCTATGAGCTGTGAG--CTGTTAGCC
CTGAACCCCGAACCTCGAGA-------ATTGAACCT-------TTCCCGGGGCAGG-AA-
GGCTTGCATGCGGGCCTTTTCCAGGTCG-GCCAGTAGGTAGAG-TAGATGC-GATGCGGC
TATTCCGGGCGAGTTTATGCCAATGCAAATTGC-GGCGCAATATAACCCAATAATTTGAA
GTAACTCG------------------------------------C--AGGAGCGAG----
------------G----------------------TATCTTTCCTG------G-------
--TTACCCG-----GTACTGCATAACAATGGA----------ACCCGAACCGTAACTGGG
A---------------C----------------------------AGATCGA---AAAGC
TGGCCTGGT----------TTCTCG--------CTGTGT---------------------
GTGCCGT-------------------GTTAATCCG-TTTGCCATCAGCCAGATTATTAGT
CAA-----------------------TTGCAGTTG-------------------------
-------------CAGCGTTTCGCTT---TCGTCCTCGTTTCACTTT-------------
----------------------------------------------CGAGTTAGACTTTA
TTGCAGCATCTTG----AACAATCGTC---------------------------------
-----------GCA-GTTTGGTAACACGCTG---------TGC---------CCT-----
---------------ACTTTC-------------------ATTTAGAGGGAAT-CGAGGG
ACCCTGGACTCT-----AATCGCACAACGA------------------AACC--GGGTTG
-----CAAAGTCA----GGGCATTCCG------CCGATCTA------GCCATCGCCATCT
TCTGCGGGC-------GTTTGTTTGTTTGTTT--GCTGGGATTA----------GCC-AA
GGGCTTGACTTGGAACCCA-----------------------------------------
-ATCCCGATCCCTAGCCCG------------------------ATCCCAATCCCAATCCC
--TTGCCCTTTTCATTAGAAAGTCATAAAA-ACACATAATAAT--GATGTCGAAGGGATT
AGG-----GGCGCG-----CAGGTT----------AAGGCCGCGCAATTAACGGACTAGC
-GAACTGGGTTATTTT-----------TTTGC-------------------------GCC
GA-----------CTTAGCCCTGATCCGCGAGCTTAACCCGTTTTGAGCCGGAC------
AGCAGGTAG------------------TTG-TGGGTGGAC----------CCCACT----
-------------------------ACTTTT---TTGGCCCAA--------------CCT
CCAACCTAACTTGCG--CAAGTGGCAAGTGGCCGGTTTGCTGGCCCAGGAGA--------
----------GGAGGCACTATC---GCCCTGGT-ACAGTTG-GTA-CGCTGTG---CATG
ATTATATCATCATAATAAATGTTTTGCCCAACGAAACCGA-------AAACTTTTCAAAT
TAAGTCCCGGCAACTGGGTCCCC-AT--------------TTTC----------------
-------------------CATTT-TCCATGT-TCT--GCGGGCAAGGGCG---------
---------------------------GCCATTATC-TCGCTACAGCA-------GATCC
CAAATGGTTATGGCTGGACACCCCT------GTCGCCGCT-CCAACG-GGGTGGATGAAG
CCCCCAAAACCCGAAAG-TCATGGCAGCCATGG--------CAGTGTGGGGCTGTTAAAC
GTGCGGC--ATAATATTAAGACTTCATAAAAGCGCAAATAATTC-GCT-GGCA--GGC--
-GATCGATAA-----------------------TACA-----------CACAT----ATA
TATAG----------TGGGATACACA------------CACTCTCTG-------CCGACA
AACACACACCACCC----------GACC--------------------------------
-------------CGACTGAGCG-----------------------GCATAATGCCATAT
CATTCT------TGATGAAGCCGATAAAATCCCATTATTAAGGGGGC-CCG-CCCGTCCC
GCTCGCTCCTGCGGAGCAGCC-GCCTGCGGGCGGGCGAGACAAAAGATTCGCTCATCCGC
TATGAATACC--AAATCGGAG--------CTCTCTC----TCTCC---------------
-----------AGGTCGGGA------GTGC---------CA--TGGCCAGCACGGCCAGG
ACCTCCTCATGGTCCTGCCGA-GCAGAGAGCGCG
>droSec1 .
AGAGCGGCTTACGTTATTTGAAAAAGTGTTGCATAC---TTTTGAGATTGCG-TTTGAGC
TACGTTACTTACA------------TATTTCCTACATGACACGGGCATACACAAATGTAG
AT-AA-----AAAATTGGCTTCA-ATGTATATAAAAT--CGAGTATAAAATTATT-----
-------CACATGAGAATTAAAAAAA-----CC-TGCTGTGTAAGATGTTTGTTAG--AA
ATTATCAA---AACCTC--TAATAAATTTGT----------------C------TAATTT
A----TTT-------CTACATAGAAAGGTTAAGAGCTA-----TTTGGTTACTGTTTAAC
TCCTTTATTTGTT----TGTGCAAGT--ACTTACATTCGTAATTAT------------TA
AAA-----T---------------------GTATGTATATATAATGTATATAATA-----
GTATTCTAAATGGTAAAAGCCCATCCT----AAGCGGTTT----CTATTGGAAAACGCTC
AAGGAATAAAAGCCATTCAACGA-T-GATTCAATTCA---------------ATTCA---
CTCACTTTCTGCTCGCAGCAA---GGTCTGCTGAGTAAAAAATTAGCACATCCTCAGCGC
TGATAAACGCATCCTTAAAA-CACCCCCTG---CCCAT--CCCA----CCAGCCA----A
GCAACCATCCG-------TCCATCCTGCATCCGCATCCCT---------TTGCACAGAGA
GC----------GGCCCAATTAGTGCTGCAGTAGGCATTTCAAATCCGTGCCCACAAAAC
GGCTAATCCGCTGCCA-----CTGCCTGCCGATCCAGAGTCCAGAGTCCAAAAGTCCTGT
GTGC-AATGTCC-AGATTT---CCGAGTCGCAGAGTCTAAATGTTGACAAATACAACACC
-----------------TACGATACAAATAAAATTGCTACAGAAGTACCACCTAAAA---
--------------ACGGGCA------CAACCGGAACGACTTAATTTTCTCAAATTTA--
-CAGAAACAGACGATGACATA--------GGAATGGGAATGGAAATGGTGATGGAAAC-A
----CAGGAAGATATCTCGACGCCGCCACTGAAGCTGTGGGTTTGCTCCTGCCGAGC---
--GAATC-------------C-AACGCGAGTAGG-GTCCC-------------ATTCG--
GGGCC---GGAGTAGCCAGAGTCCTGCAGCTCACT-------CG-AAAC--------CGC
CACTCACCGTGGCTAA-TTGCCCATCAATAAA-GGGCCCGGGCAGCGAG------GAATT
CCTCCGAAAGC--------------CGGG-----------------TCCT----------
----------------CCGTTCTTC----AG----------CCGAAGATTTCCTCGA--G
CAACCAAAATATTATGGTGTGCCCCGCTGTTCTCGCACAGTCAGCGCGAATTTGCTGCGG
TA--AGTCGATGCTGTTTCGCAGGACCTTCTtc---cctct---tcc---------tct-
ccctcttg-ctctgg------------ctgtccctg------ttcctctG----------
-----CAGTTCCTT---------------TGCTCCTTTGGCGGCACTGT-----------
-------GTCCTGTCGTCG--TTGTTTTCCTGTGATTTGACATGTCTGTTAGCAGGA---
---TGCCTGACCCTGAGGCCGAGTCCTGGACTC---AGTGTCCACTGTTCCACTTTGATG
TGATTCGTCAGTGCGGTGGACTACT-GCTACTGCTCTCTTGCAGG----ACAGCGTCTTG
A--G--TCCTG--TC-----CGGCTGCCC-------------------------------
--------CCTCCCGCGA---------------CCTCTGACCCTGCAC------------
TCTG------CGGCTTTCCAGCGGCGTTTGTTGGCGAATCT--GACCCC-----------
--------------GAGCTCCTGCTGCTCCTTCGCT--------------CCT-------
------------TCTCCGCTCTT----TGGC---------------------------C-
--TTCG--CCCGAATCGAAATTGGTCACAGCT-------CCGAGTGA------ATTGCCC
CGGAGACCGCAATGCGCTGTATTTATAGTAAACGTGTCCGATTGATTTGGCCACCCGTGG
CGGCT----------CTGTCACAGATGCC---------TCAATTTGCATCTATCAAATGG
TTTACATGGCTCTAAAAAG-----GTCCCTCGATGGGTCG---CCAATG-TGGTAACTTC
TCAACATTGCAAGGCTCTTACTTGTGAATTATTAAAT----GTAACTACAGCGATATAAG
TCATGGCAGTTTCTGTTTTCTTTATAGGAGGTA---------ACTTAA------CATG--
---T-------AATATGAATACCAACGA-----GCTCAAGT----TGCAAAT--------
----------------------------ATGATCAAATTTAGCTGACAATCATGATAATG
--TTCCTG-GTTATCACGTTGTAATATCCTTTCTCAAAAGCTTAAATGGTTTTATCAGAT
ATGTATAACAAAAAGTTAAGAAATGGTAATAAAATCAAATTAGTTAGAATTATCTTTGTG
AGTGTAAAAAAATG--GATGGCCTAATCT-------ATGCCATGATGTG----TCCTACT
TT--GAGATTTCGCCCCTG-----------------------TCCT--CATTGATGGTT-
--TCCCGGGGCTACTTGGCTCAAAAATCCCGGCCGTCCAAAAAGA------TGATCCTTA
AAAAAGAAACCGC-TAATCATTGG----G-CCGCACAAAGAGCGGACAATCGCTC-----
--ACCTAATTATTTGGCCCGATTGTGAGGAGC--GGACACTCGGCTCGTGGACGCTTTTT
GTGGCC--------TCTTTTTG-TT-------------CCGACAAAAAGCGAGCCAATTT
TTTTTCTTTCTGGGCCACTTTGTTGCTCTTTTTATGAGTTTTTT--------CCATTGTC
AC-TTTTTCCG-GGCCTGCCCAGCAGCCC----TCGAT-------TCCCGCGATGCCTGC
CCTACAAACCTCCTAATTACGGCAGTT------------AGTCGTTGTCC------GGAC
AGGAGAATAT--------------------------------GCGGAA-GGACA--TGCG
----TGCGTTTATTGCCCGCTCGAATTTCCACTAAAAATTAGGCCGG--AAAAAAAAAAC
TAGGTAG-------GACTA--GGAACTGGAAACTAGCAAAGCGGACGCGCCTTTTTATTG
GTGCACCTTCGGCGGA---------------ACCGCAGGATAACAGCAGTAAAAGCGACG
ACGAGGACAC-----------AAGGATCCTCAAAATCG-AG------------AGCGACC
TCG-CTGC-ATTAGAAAAC-------TAGATCAGTTTTTTG---------TTCTG-GCCG
GCCGATTTTTGTGCCCG-G---TGCTCTCTTTACG--------GTTTATGGCCCCGTTCC
-----------------------------------CATTTCCCAGCTCCTTTGTT---CC
GGGCTCAGAAATCTGTAT-GGAA-TTAT--------------------------------
-GG-----TATATGCAGATTTTTATGGGT--CCCGGC--GATCCGG--------TTCGC-
GGA-----------ACGG--GAGTGTCCTGCCGCGAGAGGTCCTCGCCGGCGATCCTTGT
------------CGC-CCGTA--TTAGGAAAGTAGATCACG---TTTTTTGTTTCCATTG
TGCGCTTTTTTC-GCTGCGCTA-T--TTTTTTTCCGCGAACC----------CAGCG---
--------AACTGCTCTAATTTTTTAATTCTTCACGGCTTTTCATTGGG--------CT-
-CCTGGAAAAA-------CG--CGG-----------------------------------
---ACAAGGTTATAGC--------------------------------------------
---------GCTCTACT------------TACCTG-TAATGGTGGCCATAACTCGCAC--
--------------TGCT---CT-CGTTTTTAAG---------ATCC----GTT------
----TGTGTT----------TG-----TTTGTCCG------------------CGTTTTT
ACGAGCTCGT----------TCCTTCGGTTCCAACCATGTCCAG----------AATTAT
GCCAGTTTGTTTTTGT------CTCTGG------CAATTATTGGAAATTTCATTGGGTCG
ATTG---------------GGTCGATGTCGCTGCCTTCCTTCCTCTTCCCTCGGGAAAAA
GTGAATAGGTTGGGCCATAAAAATCGCTGCTCCTGGAGACCAGA-GAAATGGATTTGT-G
TAAGC-ATTAAAAATGCGAGACAATCCCCAAGATTCCTCCACTGTTTTTTTTTATATTGC
CCACTGCTAAATGCAGCTAATTC----------GTCGATTGTCTGAAAAGCGTTCTTCAA
GCTGAATCACTTTTTTATGATG---------TTTGCTAGAAAATTAAATTACTTATGTTG
CCATTCATA-----CATCCCCCCTCACATTTTATGGCCATTTGAGTGTGCGGGGTGCAAA
--GTTCTGTCTTAAGTGGCGGCTGGAAACCAC-----CACATTTACTCGAG-----GGAT
GATGTGCT--------------CTAATACCTCCTCAACAAAT------GGGATGGT----
-CTCT--------ATGGCAG----GACAAAATCTTTGTAAAATGAGGCGGAGTTAAAAA-
-CATACCTAAAATGTTA-------TAGCC-TTTTGAAATATTACAAGAT-----------
-----TTTTAGAATTGTCTGGAAATGTCAATATCATTTTTTATTTAAGCGTGTGTCAATA
TATAACAGCAGTAAAAATATATGCAATATAT----GCTTACTTAAGCTCAAATGAACata
taaatttataa----------tatat---------taGCACCAAAATGA--AAC-AAGTG
GCATACTAATTCAGCAAGTCAACAGATTATTTAACCAATTA-TTCAAAAT---GAAATAA
TATATATGTG--TGTTTTTTTTT------AAAATCTGGCATGT--GGATTTC----TAAA
ATAGA-TT----GCCAAACAAATTGTAAGTA---TATATTTATACATATCATATG--TCA
A---CTAATAAAT-TTAGCAAATAAAAC---GTACCTGCAA---------TATACATTTA
TTGGATCAA--TTATGTAAAAAACTGAGCTGGCAC------------TCTT---------
------CCAAAGAATG-----------GGACTTCGAGGACTCCG----TGCTGAATCACT
TACTCAACCCATCCCAACTCATCCAATCCGCGCAATCATCATAAATT-TTGGTCTTTTTG
TTGTAATTGTTTTATGGCAGAAATTACTCAATCATCA-AGCATAATTCCCTCGTTTTCGC
CGTTTTATTGCCAATTTTTGCAC--TGCCT-TTGCCTTT-----TTCCCGCCCT-----T
CCCTCAGCGTTTTGCGAATCTTCGCCG--------GCATTTCTATTGCGCGGACAA----
--------------------TTCGGCCAGTGTGT-TGGCCATTTACTTGCCATGATGACG
AGCATAATCAGCGA-----GATCGGCGCTTTG--TGAGTGCA-GAATGTGCAATAAAGCG
GCAACA--------ATCGGCAGGG-ATTCGCCTTC----------CCGTATTCCGGGTAT
TGCCG----GCCCGG-------------------------------------GAAAATGC
--GAAAGTGTTT---GCG-------GATCGCAAACG-GTATCGAGATGGTA-----GAT-
-----------AGAGGATTGAGTATT---CAACAGA------GGCAGGTAC---------
----TTCCGCGGC-CG---GACACTTTCGCCTA-Ac--caagccagtccaacccatccca
a----------tccaa---tccaacccaCCCGATCGCCATAAAGGGTATTTACTGTCGCT
GCCGCAGAGCC--------------------TCGCTTGA----------TGACTTAACCC
AAGAGGTCGTTTCGCGTC---------CATTCTC--------CGG---------------
-----------ACGG-AGTCAAA--GACAAAGGCCGGCGGAGGTGGACAATAGGCAAGGT
TGTTGCTTGTGGGTAGGGTT-----------TGAGCTATGAGCTGTGAG--CTGTTAGCC
CTGAACCCCGAACCTCGAGA-------ATTGAACCT-------TTCCCGGGGCAAG-AA-
GGCTTGCATGTGGGCCTTTTCCAGGTCG-GCCAGTAGGTAGAG-TAGATGC-GATGCGGC
TATTCCGGGCGAGTTAATGCCAATGCAAATTGC-GGCGCAATATAACCCAATAATTTGAA
GTAACTCG------------------------------------C--AGGAGCGAG----
------------G----------------------TATCCTTCTTG------G-------
--TTACCCG-----GTACTGCATAACAATGGA----------ACCCGAACCGTAACTGGG
A---------------C----------------------------AGATCGA---AAAGC
TGGCCTGGT----------TTCTCG--------CTGTGT---------------------
GTGCTGT-------------------GTTAATCCG-TTTGCCATCAGCGAGATTATTAGT
CAA-----------------------TTGCAGTTG-------------------------
-------------CAGCGTTTCGCTT---TCGTCCTCGTTTCACTTT-------------
----------------------------------------------CGAGTTAGACTTTA
TTGCAGCATCTTG----AACAATCGTC---------------------------------
-----------ACA-GTTTGGTAACACGCTG---------TGC---------CCT-----
---------------ACTTTC-------------------ATTTAGACGGAAT-CGAGGG
ACCCTGGACTCT-----AATCGCAAAACGA------------------AACC--GGGTTG
-----CCAAGTCA----GGGCATTCCG------CCGATCTA------GCCATCGCCATCT
TCTGCGGGC-------GTTTGTTTGTTTGTTT--GCTGGGATTA----------GCC-AA
GGGCTTGACTTGGAACCCA-----------------------------------------
-ATCCCGATCCCTAGCCCG------------------------ATCCCAATCCCAATCCC
--TTGCCCTTTTCATTAGAAAGTCATAAAA-ACACATAATAAT--GATGTCGAAGGGATT
AGG-----GGCGCG-----CAGGTT----------AGGGCCGCGCAATTAACGGACTAGC
-GAACTGGGTTA-TTT-----------TTTGC-------------------------GCC
GA-----------CTTAGCCCTGATCCGCGAGCTTAACCCGTTTTGAGCCGGTC------
AGCAGGTAG------------------TTG-TGGGTGGAC----------CCCACG----
-------------------------ACTTTT---TTGGCCCAA--------------CCT
CCAACCTAACTTGCG--CAAGTGGCAAGTGGCCGGTTTGCTGGCCCAGGAGA--------
----------GGAGGCACTATC------------ACAGT---GTA-CGC--TG---CATG
A-TATATCATCATA--TAATGTTGC-CACGACGAA-----------------CTTCATAG
TCCGCACTGG--------------------------------TC----------------
-------------------CATTCATTCATG--TCT--GC-GGCAGGCGCA---------
--------------------------------TATC-TCGCTACAGCT-------GATCC
AAAATGGTTATGGCTGGACGCCCCT---------GCCGCT-CCAACG-GGGTGGATGAAG
CCCCCAAAACCCGAAAG-TCATGGCAGCCATGG--------CAGTGTGGGGCTGTTAAAC
GTGCGGC--ATAATATTAAGACTTCATAAAAGCGCAAATAATTC-GCT-GGCA--GGC--
-GATCGATAA-----------------------TACA-----------CACAT----ATA
TATAG----------TGGGATACACA------------CACTCTCTG-------CCGACA
AACACACACCACCC----------GACC--------------------------------
-------------CGACTGAGCG-----------------------CCATAATGCCATAT
CATTCT------TGATGAAGCCGATAAAATCCCATTATTAAGGGGGC-CCG-CCCGTCCC
GCTCGCTCCTGCGGAGCAGCC-GCCTGCGGGCGGGCGAGACAAAAGATTCGCTCATCCGC
TATGAATACC--AAAACGGGG--------CTCTCTC----TCTCT---------------
-----------AGGTTGGGA------GTGC---------CA--TGGCCAGCACGGCCAGG
ACCTCCTCATGGTCCTGCCGA-GCAGAGAGCGCG
>droYak2 .
AAAGCGGCTTACGTTAATTGAGAAAATGTAGCATAC---TTTTGATACTACGATTTCGGC
TACGTTACTTACA------------TATTTCCTACATGACACTGGCATATACATATGTAG
AT-AACTGTCCATATTGGCCAAG-C--------------TGCACATAAAATTAGT-----
-------CACAAGGGACTTTAAAAATAACAACCACCCTACAAA-------TATTAC--AA
ATTATCATACTAGCAGC----ACGAGTGAAC----------------A------AAATCT
G----GATACATAATCTACGTAGAAATGTAAAGAGCAA-----TTTGGTTTCCTTTTAAC
TTCCTCATATGTT----AGTGTATGT--TCGTGTGTAACTAACTTT------------TA
AGA-----T-----------------------------------------AAATA-----
GTATTTTGAATTGTGAAAGCC---CCT----AAGCGGTTT----GCTTGGGAAATCGCTC
GAGGAGCAGCAGCCATTCAACGA---GGTTTAATTCACCCCCAA-CCTGCGCACTCAGTG
CTCACTTTCTGCTCGCAGCCA---GGTCTGCTGAGTAAAAAATTAGCACATCCTCAGCGC
AGATAAACGCATCCTTAGAA-CACC--CTG---CACCT--CCCA----CCTCTCA-----
-CATCCATCC--------CGCATCC-GCATCCGCATCCCT---------TCGCACAGAGA
GC----------GGCCCAATTAGTGCTGCAGTAGGCATTTCGAATCCGTGCCCACAAATC
GGCTAATCCGCTGCCA-----CTGC-----------------------------------
-----------C-AGATTT---CCGAGTCGCAGAGTCTAAATGTTGACAAATACAACACC
-----------------TACGATACAAATAAAATTGCTACAGAAGTACCACCTAAAA---
--------------ACGGGCA------CAACCGGAACGACTTAATTTTCTCAAATTTA--
-CAGAAACCGAAGATGACTTA--------------------GGAATGGGAATGGAAAC-A
----CAGGAAGATATCTCGACGCCGCCACTGAAGCTGTGGGTTTGCTCCTGCCGAGC---
--GAATC-------------C-AACGCGAGTAGG-GTCCCCAGTAGGGTTCGGGTTCT--
GGGCC---AAAGTAGCCAGAGTCCTGCAGCTCACT-------CG-AAAC--------CGC
CACTCACCGTGGCTAA-TTGCCCATCAATAAA--GGCCCTGGCTGCGAG------CAATT
CCTCCGAAAGT--------------CGATT--------------CCTCCT----------
----------------CCGTTCTCC----AG----------CCGGAGATTTCCTCGA--G
CAACCAAAATATTATGGTGTGCCCCGCTGTTCTCGCACAGTCAGTGCGAATTTGCTGCGG
TG--AGTCGATGCTGTTCTGCAGGACCTTCTtctttcctct---tcgctctttccttct-
ccctctttcctctgcatgtccctgtccctgtctctg------tcccttttcctttcccAA
CCTCCTGGTTCCTT---------------TGCTCCTTTGGCGGCACTGT-----------
-------GTCCTGTCGTCG--TTGTTTTCCCGTGATTTGACATGTCTGTTAGCAGGA---
---CGCCTGACCCTGAGTTCGAGTCCTGAACTC---TATGGCCAGTGTTCCACTTTGATG
TGATTCGTCAGTGCGGTGGACTACT-GCTACTGCTCTCTCGCAGC----CTTGTGTCCTG
G--G--TCCTG--TT-----CCGCTGCCC-------------------------------
--------CCTCCTGCGA---------------CCTCTGACCCTGCAC------------
TCTG------CGGCTTTCCAGCGGCGTTTGTTGGCGAATCT--GACCCC-----------
--------------GAGTTCCTGCTGCTCCTTCGCTCTCCGCTCTTCGCTCCTTTGCTCC
TCCGCTGCTCGCTCTGCGCCCTT----CGCC---------------------------C-
--TTCG--CCCGAATCGGAATTGGTCACAGCT-------CCGAGTGA------ATGGCCC
AGGAGACCGCAATGCGCTGTATTTATAGTAAACGTGTCCGATTGATTTGGCCACCCCTGG
CGGCT----------CAGTCACAGATGCC---------TCAATTTGCATCTATCAAATGG
TTTACATGGCTCTAAGGAAGCCATGTTCCTCGATGAGTCG----------CCGTGGTGCC
TTGGCATTGCAATGCGCTTGCTGGTGAATTATTAAGTGTAAGTAACTACTGCGATATAAG
TCATGGCCGTAGCTCTTCGGCACCTGGCA-------------AATTGG------CATATA
TTAT-------ATAATGAATATCAAGGA-----GCCCGAAT----TGCAAATAT------
GATCAAA-GACCATTATTGTACCATCTTACAATTAAATGTTGTTGAC----------ATG
GACTCCTT------GACTCCATGTTATCTTTTTGCATGTATCCAAA---------CTGCG
GTGCATTTTTGCAAAG-AAGAAAGGCTAATGAGATCAAATTAATTGGAATAATCTACGAA
AAG-T-AAAAAATGGAGATGCCCTAATCT-------ATCCCATGATGCCA---ATCTGCT
TT--------------CTG-----------------------CCCT--CATTGATGGTT-
--TCCC-GGGCTACTTGGCCCAAAAATCCCGGCCGGCCAAAAAGA------CGATCC-TA
AAAAAGAAACCGC-TAATCATTGG----G-CAGCACAAAGAGCGCACAATCGCTC-----
--GCCTAATTATTTGGCCCGATTGTGAGGAGC--GGACTGCCGGCTCGTGGACGCTTTTT
GTGGCC--------TCTTTTTG-TT-------------TCCACAAAAAGCGAGCCAA--T
TTTTTCTTTCTGGGCCACTTTGTTGCTCTTTTTATGAGTTTTTT--------CCATTGTC
AC-TTTTTCAG-GGCCTGCCTCGCGGCAC----TCGAT-------TCCCGCGATGCCTGC
CCTACAAACCTCCTAATTACGGCAGTT------------AGTCGTTGTCC------GGAG
AGGAggacatgcggacatgcggacatacggacaagcggacacgcggaA-GGACC--TGCG
----TCCGTTTATTGCTCGCTCGAATTTCCACTAAAAATTGGGCCGGA-----AAAAAAC
TAGGTAG-------GACTAGGGGAACGGGAAACTAGCGAAGCGGACGCGCCTTTTTATTG
GTGCACCTTCGGCGGA---------------ACCGCAGGATAAGAGCAGTAAAAGCGACG
ACGAGGACAC------------AGGATCCTCGAAATCG-AG------------AGCGACC
TCG-CTGC-ATTAGAAAAC-------TAGATCAGTTTTTTG---------TTCTG-GCCG
TCCGATTTTTGTGCCCG-G---TGCTCTCTTTACG--------GTTTATGGCCTTGTTTC
C---ATTTCGTCATTTTTCCATTTTTCTATTTTTCCATTTCCCAGCTCCTTTGTG---CC
GGGCAAAGAAATCTGTAT-GGAA-TTAT--------------------------------
-GG-----TATATGCAGATTTTTATGGGT----CGCC--GATCTAG--------TTCGC-
GGA-----------ACGG--GAGTGTCCTGCCGCGA--GGACCTCAGCAGCGATCCTCGT
------------CGC-CCGTA--TTAAGAAAGTAGATCACG---TTTTTTGTTCCCATTG
TGCGCTTTTTTC-GCTGCGCCA-C--TTCTTTTCCCCGAACC----------CAGCG---
--------AACTGCTCTAATTTTTTAATTCTTCACGGGTTTCCATTGCGACGAAAAACA-
-GGAGGAAAAA-------CA--CGG-----------------------------------
---ACAAGGCTATC----------------------------------------------
---------GCTCTACTGACACTTACCCGTACCTG-TAATGGTGGCCAAAACTCGCCC--
--------------TGCT---CT-CGTTTTTAAG---------ATCC----GCT------
----TGTGTTTC--------TG-----CTTGTCCGCGATGGCGATGGCATTCACATTTTT
ATGAGCTCGT----------TCC-TCGGGCCCAACTACGTCTAA-----------A-TAT
GCCAGTTTG-TTTTGT------CTCTGG------CAATTATTGGAAATTTCATTGGGTCG
ACTG------CGTCGATTGAGT-------GATTCCTTCCCT-----------GGG-GAAA
GCGAATAGGTTGGGCCATAAAAATCGCAGCTCATGGA-CCCAGT-GAAATGGATTTGT-G
TAGAA-------------------TGCCCCAGTTTCATTCGCGG--CTTCTCTACATT-G
CTACTGCTAAATGCAGCTAATTCGAGTCGCTAAGTCGATTGTCTGAAAAGTGTTCTCTAA
GCTGAAGCACTTTTTTATGATGTTTGCGATGTTTGCTGGAAAATTAAATTACTTATGTTG
C----CATA-----CAT--CCCCAGACATTTTATGGCCATTTGA--GTGCGGGGTGCGCA
--GCTCTGGCTCAAGTGGAGGATGGAAACCAC-----CACATTTATTCGGG-----GGAT
GATGTGCTCTAATACCTAATACCTAATACCTCCTCATCAAACGGGCTGGGGATGGT----
-CTCTT----CGTATGGAGAGTGTGGCGAGATCTTAG-AAAGCGAGGCGGAGTTAAAAA-
----GCC----AAGTTA-------TAGCT-TTCTGAAATATGTAAGGATATAAAACATGG
ATATATATATATATTGACAAGAAATACCAAAGACCTCTTGCATTTAAGCGAGTGC-----
---------AGC---------CCAAATATATACATACGTACCTATT--------------
----TCCATAT-GTATATTGCTTTAT------------TACTCTAATGGTCTAC-AAATG
GTCTACTAATTTAGCAAGTCGGAAGATTATTTCAGCAATAA-TTCAAAAG---AAAATAA
AATATACCTA--TG---CCGTTG------AAAATGTGCCAA----GGGGTTT----CAAA
ATAGA-TT----TAAAAGAAAATTATGAGCA---CATGTGCA----------------CA
A---CTAATAAGG-TTCGCATGTAAAAC---TCACCTGCTTAG---AT-CTATGAATTTA
----AAAAA--CTGTTGTAAATCCTGCGTTGGCAC------------TCTT---------
------CCCAAAAATG-----------CGTCTGCGAGGACTCCG----CGCTGAATCACT
TACTCAACCCATC----------CCGTTCGCGCAATCATCATAAATG-TTGGTCTTTTTG
CTGTAATTGTTTTATGGCAGAAATTACTCAATCATCA-AGCATAATTCCCTCGTTTTCGC
CGTTTTATTGCCAATTTTTGCAC--CGCCT--CGCCTTT-----TTCCCGCCCT-----T
CCCTCATCGTTTTGCGAATCTCCGCCATTTCCCCGGCATTTCTACTGCGCGGACAA----
--------------------TCCGGCCAGTGTGT-TGGCCATTTACTTGCCATGATGACG
GGCATAATCAGCGA-----GATCGGCGCTTTG--TGAGTGCA-GAATGTGCAATAAAGCG
GCAACA-------------------ATTCGCCTTC----------CCCTATTCCGAGTAT
TGCCA----ACCCGG-------------------------------------GCAACTGC
--GAAAGTGTTT---TCG-------CATCGGGATCG-GGATCGGCATCGGCATCGGAATC
AGAATCGGGAAAGGAGATTGAGC-TA---TGACAGAGGTACCGGCAGGTAC---------
----TCCCGCTGA-CG---GACACTTTCGCCTA-AC--CAAGCGAGCCCAACCCAAT---
-----------CCCAA---T----CCCACCCGATCGCCATAAAGGGTATTTACTGTCGCT
GCCGCAGAGCC--------------------TCGCTTGA----------CGACTTAACCC
AAGCGGTCGTTCCGCGTC---------CATTCTC--------CGG---------------
-----------ACGG-AGTCAAA--GACAAAGGCCGGCGGAGGTGGACAATAGGCAAGGT
TGTTGCTTGTGGGTAGGGTT-----------CGAGCTCTGAGCCTCGAATCTCGCGAACC
TCGAACTTCGAATATTGTAAATTCAATATTGAACCT-------TTCCC-GGGCAAG-AA-
GGCTTGCATGTGGGCCTTTTCCAGGCCG-GGCAGTAGGTAGAT-----------------
-------GGCGAGTTAATGCCAATGCAAATTGC-GGCGCAATATAACCCAATAATTTTAA
CTAGCTCG------------------------------------C--AGGAGCGAGGCAT
CCTTGCATCCTTG----------------------CATCCTTCCCGGTTACAG-------
--TTACCCG-----GTACTGCATAACAATGAA----------------CCCGAAACTGGG
A---------------C----------------------------AGATCGG---AGA--
-----TGGTGTGTGTGTGCTTCTCG--------CTGTGT---------------------
GTGCCGT-------------------GTTAATCCG-TTTGCCATCAGCCAGATTATTAGT
CAA-----------------------TTGCAGTTA-------------------------
-------------CAGAGTTTCGCTT---TCGTCCTCGTTTCACTTT-------------
----------------------------------------------CGAGTTAGCCTTTA
TTGCAGCATCTTG----AACAATCGGC---------------------------------
-----------GCA-GTTTGGTAACACGCTG---------TGC---------CCTAGCCC
T--------------ACTTTCCCCGG-CCGATTCAG-CGGATTTAGACGGAAT-CGAGGG
ACCCT-GACTGCACTCGGTTCGTTATATGAAACCGAAAACAAAACCTTAACC--GGGTTG
-----CAAAGTCA----GGGCATTCCGACGATCTCGCCATATCCATCGCCATCGCCATCT
TCTGCGGGC-------GTTTGTTTGTTTGTTT--GCTGGGATTA----------GCC-AA
GGGCTTGACTTGGAACCCG-----------------------------------------
-ATCGT------------------------------------------------------
-----CCCTTTTCATTAGAAAGTCATAAAA-ACACATAATAAT--GATGTCGAACGGATT
AGG-----GACGCGACTCGCAAGTC----------CAGGCAGCGCAATTAACGGACTAGC
-GAACTGGGTTA-TTT-----------TTTGC-------------------------GCC
GA-----------CTTAGCCCTGATCCGCGAGCTTAACCCG-TTTGAGCCG--CCAGTCG
AGCAGGTAG------------------TTC-CTG----------------CCCAC-----
-------------------------ACTTTT---TTCGCCCAT-----------------
CCATCCCCGCTTGCG--CAAGTGGCA-------AGTTCGCTGCCCCAGGAAaggaggagg
atgaggaggaggaggCACTCTGTCTGGCCTGGT-ACAGTCG---C-CTCTGGG---CATG
ATTATATCATCATAATAAATGTTTTGCCCAACGAAACCGA-------AAACTTTTCAAAT
TAAGTCCCGGCAACTGGGTCCCC-AT-TTCCATTTTCCATTTCCCGCTTGCTTCCCCTTT
TGCTTTTCCTTTCCATTTTCCTTT-GCCACGT-TCT--CCGGGCACGGGCG---------
---------------------------GCCATTATC-TCGCTACAGCATGCTACGGATCC
CAAATGGTTATGGCTGGACACCCCT---------CCCGCT-CCAACG-GGGTTGATGGAG
CCCCCAAAACCCAGCCAGCCATGGCAGCCACGGCAGCTCCACAGTGTGGGGCTGTTAAAC
GTGCGGC--ATAATATTAAGACTTCATAAAAGCGCAAATAATTC-GCT-GGCA--GGC--
-GATCGATAACTA--------------CACATGTACA-----------TACAT----ATC
TATATCTATATCTACTGGGATACACA------------------CTGGGCTGCACT----
----------ACCC----------GACC--------------------------------
-------------CGACTGAGCG-----------------------GCATTATGCCATAT
CATTCT------TGATGAAGCCGATAAAATCCCATTATTAAGGGGG--CCG-CCCGTCCC
GCTCGCTCCTGCGGAGCAGCC-GCCTGCGGGCGGGCGAGACAAAAGATTCGCTCATCCGC
TATGAATACC--AAATCCGAAT----GTGTGCTCTC----TCTCC---------------
-----------AGGTCGGCA------CTGCCATGGCCAGCA--GAGCCAGCATGGCCAGG
ACCTCCTCATGGTCCTCCCGA-GCAGAGAGCGCT
>droEre2 .
AAAGCGGCTTACGT--ATTGAATAAGTGTAGCATAC---TTTTGATAC-ACGTTTTGAGC
TACGTTACTTACA------------TATTTTCTACTTGACACTGGCATACACAAATGTAG
AT-A------CATGTGGGCTAAC-TTGTATCTGACA---TGCGTATAAAATTAAT-----
-------CACAAGGGACTTTAAAAAGAACTGCC-TCTTACACA-------ATTTAT--AA
ATTATATT---------------------GC----------------A------TAATCT
T----GTT---TTGTCTACGTAGAAAAGTTGAGAGCAA-----TTTTGTAGCTATTTACC
ACCTCCAATTGTT------------------TAGGTAACTATCTTT------------TA
AGA-----T-----------------------------------------GAATA-----
GTA------------AAAGCC---CCT----CACCGGTT---------------------
-GGTATCTGCAGCCATTCAACGA-T-GATTCAATTCACCCCCAA-CCTGCGCACTCAGTG
CTCACTTTCTG-TCTCAGCCA---GGTCTGCTGAGTAAAAAATTAGCACATCCTCAGCGC
AGATAAACGCATCCTTAGAA-CACCCACTG---CACCT--CCCA----ccagccatccat
ccgtccatccg-------tccatccTGCATCCGCATCCCT---------TCGCACAGAGA
GC----------GGCCCAATTAGTGCTGCAGTAGGCATTTCGAATCCGTGCCCACAAATC
GGCTAATCCGCTGCCA-----CTGCCTGACGGGCCAGAGTCCAGAGTTCA--------GG
GTGC-AGGGTGC-AGATTT---CCGAGTCGTAGAGTCCAAATGTTGACAAATACAACACC
-----------------TACGATACAAATAAAATTGCTACAGAAGTACCACCTAGAA---
--------------ACGGGCA------CAACCGGAACGACTTAATTTACTCAAATTTA--
-CAGAAACATGCGATGACATAGgggaatgggaaagggaatgggaatgggaatggAAAC-A
----CAGGAAGATATCTCGACGCCGCCACTGAAACTGTGGGTTTGCTCCTGCCGAGC---
--GAATC-------------C-AAAGCGAGTAGG-GTCCC-------------ATTCG--
GGGCC---GGAGTAGCCAGAGTCCTGCAGCTCACT-------CG-AAAC--------CGC
CACTCACCGTGGCTAA-TTGCCCATCAATAAA--GGTCCTGGCTGCGAG------GAATT
CCACCGAAAGT--------------CGCTG--------------CCTCCT----------
----------------TCGTTCTCC----AG----------CCGAAGAATTCCTCGA--G
CAACCAAAATATTATGGTGTGCCCCGCTGTTCTCGCACAGTCAGCGCGAATTTGCTGCGG
TG--AGTCGATGCTGTTTAGCAGGACCTtcttc---catct---tccatctttcatctt-
ccatcttccctcttc----------cTCTGACTCTG------TCGGTCGT----------
-CTCCTGGTTCCCT---------------TGCTCCTTTGGCGGCACTGT-----------
-------GTCCTGTCGTCG--TTGTTTTCCCGTGATTTGACATGTCTGTTAGCAGGA---
---TGCCTGACCCTGAGGCCGGGTCCTGAACTCAG-TGTGTCCAGTGTTCCACTTTGATG
TGATTCGTCAGTGCGGTGGACTACT-GCTACTGCTCTCTCGCTGA----ACTGCGTCTTG
A--G--TCCTG--TT-----CCGCTGCCC-------------------------------
--------CCTCCTGCGA---------------CCTCTGGCCCTGCAC------------
TCTG------CGGCTTTCCAGCGGCGTTTGTTGGCGAATCT--GACCCC-----------
--------------GAGCTCCTGCTGCTCCTCGGCT------------------------
-------------------CCTT----CGCC---------------------------CG
AATCCGAATCCATATCGGAATTGGTCACAGCT-------CCGAGTGA------ATTGCCC
CGGAGACCGCAATGCGCTGTATTTATAGTAAACGTGTCCGATTGATTTGGCCACCCGTGG
CGACT----------CCGTCGCAGATGCC---------TCAATTTGCATCTATCAAATGG
TTTACATGGCTCTAAAAAAG----GCCCCTCCATGGGTC------------------GCC
TTAACATTGCAATGCTCTTACTTGTGAATTATTAAGT----GTAACTACTGCGATATAAC
TCATGGCAGTTTCGGTTCGGT----------------------TTTAG------GATGCA
ACAT-------AGTATGAGTACCAACGA-----GCCCAAAT----TGCAAATACTCGTAG
GATCAAA-G-----TATTACAC------ATGATGGTATATGATT-------------ATG
--CTCCTTTATCAAGACGGCTTGCTATCCTTTTGCAATTATTCCAG---------CTG--
--ATAATGTTGC----------AGGGTAATAACATCAAATGAATTAGAATTATCTACGTC
AGGTT-AAAAAATG--GATGCCCTAATCT-------ATGCCCTGATCTTCTGTTTCTGCT
TC--GAGATTCCGCCACTG-----------------------CCCT--CATTGATGGTT-
--TGCC-GGGGTACTTGGCCCAAAAGTCCCTGCCGTCCAAAAAGA------CGATCC-TA
AAAAAGAAACCGC-TAATCATCGG----G-CAGCACAAAGAGCGGACAACCGCTC-----
--ACCTAATTATTTGG-GCGATTGTGAGGAGC--GGACAGTCGGCTCGTGGACGCTTTTT
GTGGCC--------TCTTTTTG-TT-------------TCGACAAAAAGCGAGCCAA-TT
TTTTTCTTTCTGGGCCACTTTGTTGCTCTTTTTATGAGTTTTTT--------CCATTGTC
AC-TTTTTCCG-GGCCTACCTCGCGGCCC----TCGAA-------TCCCGCGATGCCTGC
CCTACAAACCTCCTAATTACGGCAGTT------------AGTCGTTGTCC------GGGC
AGCAggacatgcggacatgcggacat----------------gcggaA-GGACT--TGCG
----TGCGTTTATTGCACGCTCGAATTTCCACTAAAAATTGGGCCGAA---AGAAAAAAC
TAGGTAG-------GACCA--GGAACTGGAAACTAGCAAAGCGGACGCGCCTTTTTATTG
GTGCACCTTCGGCGGA---------------ACCGCAGGATAAGAGCTGTAAAAGCGACG
ACGAGGACAC-----------AAGGATCCTCGAAATCG-AG------------AGCGACC
TCG-CTGC-ATTAGAAAAC-------TAGATCAGTTTTTTG---------TTTCGCGTCC
GCTGATTTTTGTGCCCGTT---TGCTCTCTTTACG--------GTTTATGGCCCCGTTTC
CATTATTTCGTCATTTTTCCA--------------CATTTCCCAGCTCCTTTGTG---CC
GCTCAAAGAAATCTGTAC-GGAA-TTAT--------------------------------
-GG-----TATATGCAGATTTTTATGGGT----CGCC--GATCCGG--------TTCGC-
GGA-----------ACGC--GAGTGTCCTGCCGCGA--GGACCTCAGCGGCGATCCTTGT
------------CGG-CCGTA--TTAAGAAAGTAGATCACG---TTTTTTGTTCCCATTG
TGCGCTTTTTTC-GCTGCGCCA-G--TTCTGTTCCCCGAACC----------CAGCG---
--------AACTGCTCTAATTTTTTAATTCTTCACGGACTTTCATTGGG--------CT-
-CCTGGAAAAA-------CA--CGC-----------------------------------
---ACAAGGCTAGCTCTAG-----------------------------------------
--------GACTCTACTGGCA--------TACCTG-TAATGGTGTCCATAACGCGCAC--
--------------TGCT---CT-CGTTTTTAAG---------ACCC----GTT------
----TGTGTT-----------------CGTCTCTGGAAAGTAGATGGCATTCACATTTTT
ATGAGTTCGT----------T--------CCCAACTACGGCTAA----------GA-TAT
GCCAGTTTG-TTTTGT------CTCCGG------CAATTATTGGAAATTTCATTGGGTCG
ATTGGGTAGATGTCGATTGGGTCGATGTCGATGCCTTCCCT----------CGGG-AAAA
GTGAATAGGTTGTGCCATAAAAATCGCTGCTCTTGGA----GAT-GAAATG---CTGTAG
TAGTA-------------------TGCCAAAGCTTCATT--CTG--CTTTTTTATTTT-C
TCACTGCTAAATGCAGCTAATTT----------GTCGATTGTCTGAAAAGTGTTCTCTAA
GCCGAAGCACTTTTTTATGATG----------TTGCTAGAAAATGAAATCACTTATGTTG
C----CATA-----CAT--CCCCAGGCATTTTATGGCCATTTGA--GTGCGGGGTGCGCA
--GTTCT-GCTTAAGTGGCGGATGGAAACCAC-----CACATTTATTCGAG-----GGAT
GATGTGCT--------------CTAATACCTCCTCATCAAAT------GGGATGGT----
-CTCTT----CGCATGGAGA--GTGGCAAACTCTTGGAAAAGTGAGGCGGAGTTAAAAA-
----GCC----GTGCT---------------------ATATAACAAGATTTTTGATATTC
AGTTATGTATATATGGACAAGAAATATCAAAGACCTTAT---------------------
----------------------CAAATATGT-------TGCCT-----------------
---------------------TTTAT------------CCTCGAAATGA--AAC-AAATG
CTCTACTAATTTGGCAAGTCAAAAGATCAGTTCAGCAATTA-TTCAAAAG---AACATAA
AATATGCGTA--TA---TTTTTG------GGAATGTACCAG----TGCTTTC----CAAA
ATAGA-TT----GCCAAACAAAT-----------------------------------CA
A---CTAATAACT-TT--------------------------------------AATTTA
----AAAAA--CTG--GGCAATCCTGAGTTGGCAG------------TCTT---------
------CCCAAGAATG-----------GCTCCTCGAGGATTTCG----GGCTGAATCACT
TACTCAACCCGTCG------ATTCCGTCCGCGCAATCATCATAAATTCTCGGTCTTTTTG
CTGTAATTGTTTTATGGCAGAAATTACTCAATCATCA-AGCATAATTCCCTCGTTTTCGC
CGTTTTATTGCCAATTTTTGCAC--TGCCTCCCGCCTTTGCCACTCCCGGCCCT-----T
CCCTCATCGTTTTGCGAATCTCCGACGGATTC---GCATTTCTATTGCGCGGACAA----
--------------------TCCGGCCAGTGTGT-TTGCCATTTACTTGCCATGATGACG
GGCATAATCAGCGA-----GATCGGCGCTTTG--TGAGTGCA-GAATGTGCAATAAAGCG
GCAACA--------ATCGGCTTGGGATTCGCCTTC----------CCCTATTCCCAGTAT
TGCCCGAGTGCCCGG-------------------------------------ACGACTGC
--GAAAGTGTTT---GCG-------GATCGGGATCG-GAATCGGAATAGGAATAGGAAT-
-----------ACGAGACTGAG----------CAGA------GGCAGGTACT--------
----TCCCGCCGGCCG---GACACTTTCGCCTA-AC--CAAGCGGactcaacccaaccca
acccaacacaacccaa---tccaacccaCCCGATCGCCATAAAGGGTATTTACTGTCGCT
GCCGCAGAGCC--------------------TCGCTTGA----------CGACTTAACCC
AAGCGGTCGTTCCACGTC---------CATTCTC--------CGG---------------
-----------ACGG-AGTCAAA--GACAAAGGCCGGCGGAGCTGGACAATAGGCAAGGT
TGTTGCTTGTGGGTAGAG----------------GGTTTCAATCCCGAA-----------
---------------------------ATTGTACCT-------TTCCC-GGGCGAG-AAG
GGCTTGCATGTGGGCCTTTTCCAGGTCGCAGATGTAGGTAGATGTAGATGTAGATGCGGA
TGGGCCGGTCGAGTTAATGCCAATGCAAATTGC-GGCGCAATATAACCCAATAATTTGAA
CCAACTCG------------------------------------CGGAGCAGCGAGG---
------------G----------------------CATCCTACCCG------G-------
--TTACCCG-----GTACTGCATAACAATGAA-----------------ACGAAACTGGG
A---------------C----------------------------AGATCGG---TGA--
-----TGGT----------TTCTCG--------CTGTGT---------------------
GTGCCGT-------------------GTTAATCCG-TTTGCCATCAGCCAGATTATTAGT
CAATTGCAGTCGCAGTCGC-----AGTTGCAGTTG-------------------------
-------------CAGGGTTTCGCTTTCCTCGTCCTCGTTTCACTTT-------------
----------------------------------------------CGAGTTAGACTTTA
TTGCAGCATCTTGCAGCAACAATCGGC---------------------------------
-----------GCA-GTTTGGTAACACGCTG---------TGC---------CCTTCCAC
TTT----------CCACATTCCACGGCCCAATTCGG-CGGATTTAGACGGAAT-CGAGGG
ACCCT-GACTAT-----GTTCGCATAATGAAAGCGAAACCA-------AACC--GGGTTG
-----CAAAGTCA----GGGCATTCCA------TCGCCGTCGCCATCGCCACCGCCATCT
TCTGCGGGC-------GTTTGTTTGTTTGTTT--GCTGGGATTA----------GCC-AA
GGGCTTGACTTGGAAccca-----------------------------------------
-atcccaatcccaatcccaatcccaaagccaatcccaGTGCCCATCCCGATCGCAGTCCC
--ATGCCCTTTTCATTAGAAAGTCATAAAA-ACACATAATAAT--GATGTCGAACGGATT
AGC-----TGCGCG------CAGTC----------CAGGCAGCGCAATTAACGGACTAGC
-AAACTGGGTTA-TTTCTATTTTTTTATTTTC-------------------------GCC
GA-----------CTTAGCCCTGATCCGCGAGCTTAACCCG-TTTGAGCCG--C------
AGCAGGTAG---------------------------------------------------
---------------------------------------CCAT--------------CC-
CCATCCTGGCTTGCG--CAAGTGGCA-------GGTTCGCTGCCCCAGGAGAGCCGT---
----------GGAGGCACTCTGGCTGGCCTGGT-ACAGTTG---C-CGCTGGG---CATG
ATTATATCATCATAATAAATGTTTGGCCCAACGAAACCGA-------AAACTTTTCAAAT
TAAGTCCCGGCAACTGGGTCCCC-ATATCCCGTATCCCATTTTC----------------
-------------------CCTTT-TCCACGT-TCTGCCCGGCAAAAGGCG---------
---------------------------GCCATTATC-TCGCTACAGCA-------GATCC
CAAATGGTTATGG----------CT---------CCCGCTGCCACCG-GGGTGGATGAAG
CCCCCAAA----------CCTTGCCGCCCATTCCAGCTCGACAGTGTGGGGCTGTTAAAC
GTGCGGC--ATAATATTAAGACTTCATAAAAGCGCAAATAATTC-GCT-GGCA--GGC--
-GATCGATAAATA--------------CATATGTACA-----------CACAT----ATA
CATAG----------TGGGATACACAC-----T---GGCAATCCCTGGGATGCAGTGGC-
GACAAGCAGCACCC----------G-CC--------------------------------
-------------CGACTGAGCG-----------------------GCATAATGCCATAT
CATTCT------TGATGAAGCCGATAAAATCCCATTATTAAGGGGGC-CCG-CCCGTCCC
GCTCGCTCCTGCGGAGCAGCC-GCCTGCGGGCGCGCGAGACAAAAGATTCGCTCATCCGC
TATGAATACC--AAATCCAAGTCAGCGCGCGCTCTC----TCTCT---------------
--------------CCAGCA------CTCT---------CG--GCACCAGCATGGCCAGG
ACCTCCTCATGCTCCTGGCGA-GCAGAGAGCGCT
>dp4 .
------------------------------------------------------------
------------------------------------------------------------
------------------------------------------------------------
------------------------------------------------------------
------------------------------------------------------------
------------------------------------------------------------
--------------------------------------GTAATTTT------------TT
TTG-----TTAGGGGTCATTGTATGTTAATTGATGTATTTATAGTA----AAACA-----
ATT----------CAAAATCCTATCCCTTTGAATTGAATT----GTATTGTATA-----T
ATGTAATTAAAGTAATTCTACTCGT-AATACAGTGCCCTCC----TCGTGGTACTGATTA
TTTCGATCCTA-TCTCATTTATGCGATCTGTT-AGTAAAAAATTAGCACATCCTCAGCGC
AGATAAACGCATCTTTAAAACTGCCATTTG---CCTCT--CCCA----CTCCTCT-----
--------------------------------GTTTCCCTCACTATCGACCATGCAGAGT
GA----------AGCCCAATTAGTGCTGCAGTAGGCATTTCAAATCCGTGCCCACAATTC
GTCTAATCCACTGCCACCGACCTGCCTGTACCGCCCATGTCCGTTCCACTCCGTTCTGGT
CTGTGAAGGATC-GGATCTGGGCCTAGTCCT---GGCTAAATGTTGACAAATACAACACC
-----------------TACGATACAAATAAAATTGCTACAGAAGTACCTCCCAAAA---
--------------ACGGGCACTGTCCCGACCGGAACGACTCAATTTTCACAAATTTACG
CCAAAACCAG-------------------GAAACAGCAAAAGAAACAGAAACAGAAAC-A
GACTCTAAAAGATTGCTCGACGCCGCCACTGAAGCTGTGGGTTTGCTCCTGCAGAGC---
-AGAGTC-------------CAAATTCGAATCGGAGTCCC-------------AGTCGCA
GAGTCCTGCGAGTAGCCAGAGTCCTGTAGCTCACT-------CGAAAAC--------CGC
CACTCACCGTGGCTAA-TTGCTCATCAATAAA--GATGCTAGCTGTGCAGGACTCGGATT
CCATTGAAAATGTTTGCATTGC--CCAGAT--------------TCTCCT----------
----------------CAACGCTCCTCCGAG----------TCCAAGTCCATGTCCGTTG
CAACCAAAATATTATGGTGTTCCCCGCTGTTCTCGCACAGCCAGCGCGAATTTGCTGCGG
TA--AGTCGATGCTG---------------------CTTTT---GGG---------TCT-
CGTTCTCGGCACGGC------------ATCTCCTTG------TCCTTTTG--------CA
TCTATGTGTATCTT--------CTGGCAGCGCTCCTTTGGCGGCACTGT-----------
-------GTCCTGTCGTCG--TTGTTTTCCCGTGATTTGACATGTCTGTTAGCAGGATGC
CGTTGCCTGACCCTGAGCCAGA-----GGACCC---TATG-----TGTTCCACTTTGATG
TGATTCGTCAATGCGGTGGACTACT-GCTACCG-ACTCTTGGCAC----TCTTGGCACTG
T--G--CTCTG--TG-----TGTATGTGT-------------------------------
--------CCTCTGGTTT---------------CTATT--TTCTGCAG------------
TCTG------CGGCTTTCCAGCAGTGTTTGTTGGCGAATCT--CTCCGT-----------
--------------TGGCTGGTACT-CTCCTGCTCT--------------CCC-------
------------------------------------------------------------
--CCTG--CCAAAAGATGCATTCGTCACAGTT-------GAAACTGG------ATTG-GT
CGCCCATCGTAGTGCTCTGTACTCATAGTAAACGAGTCCGATTGATT-GGCCACCC----
------------------------------------------------------------
------------------------------------------------------------
------------------------------------------------------------
------------------------------------------------------------
------------------------------------------------------------
------------------------------------------------------------
------------------------------------------------------------
------------------------------------------------------------
------------------------------------------------------------
------CCTTCGATGTCTG-----------------------GCCATCCATTGATGATTG
TACTCC-AGTTTCCAATTCCCTAAAACCAGAGACATGCCATAAGA---------TCC-TA
AAAAAGAAACCGC-TAATCATTTC----GCCCACACAAAGAGGGAACAATC-CTCTGGCC
AAACCTAATTATTTGACTCAATTGTGAGCCCC--G-------GGCTCGTGGACACTTTTT
GTGGCC--------TCTTTTTG-TTCCCTACACGACACTCGACAAAAAGCGAGCCAA--T
TTTTTTTTTGTAGACCACTTTGTTGCTCTTTTTATGAGTTTTTTCCATTGT-CCATTGTC
ACTTTTTTCCACGGCCTGTACTCCGACCTGGCAGCGAT-------CCTCGCTG---CTGC
CCTACAAACATCCTAATTACGGCAGTT------------AGTCGTTGTTC---------C
AGAAGGGA----------------------------------CCTGGA-CTGCA------
-------GTTTATTACGCGCTCGAATTTCCACTAAAAATTGGACCGAA-------AAAAC
TAGGTAG-------AGTCC--CG-------------------GGACGCGCCTTTTTATTG
GTGCACCTTCGCCGGAACTGAGAGCGCGACGACCGCAGAACAACGGCGAC-----CGGCG
ATGAGGATGCTGCTCCCGAGGATGCGTCCTGGCCATGGCAG------------GACGACC
TCG-CTGC-ATTAGAAAAC-------TAGATCAGTTTTTTG---------TTCTA-----
----ATTTTTGTGCCCT-GCCCTGCTCTCCTTATG-CTTTATTGTTTATGGTCCATTTCC
--------------ATTTCCATTTT----------CATTT-CCACTCCCATTGTTTGGCC
GCAAAACAAACTCCGGACGGGAA-TTAT--------------------------------
-GGTATGGTATATGCAGATTTTTATGGGCACTCGGGT--GATCTAG--------TTCGC-
GGA-----------ATGGGCGCGTATCCTGTAGCGCTGGGACCTCGAC--CGGCCCTCGG
AGGATGTCTGTATGT-CTATA--TTAGGAAAGTAGATCAAG---TTTTTTGTTCCCTTTG
TGCGCTTTTTTC-GCTGCGCTA-G--TTTTTTTCCCCGAACG----------CAGCA---
--------AACTGCTCTAATTTTTTAATTCTTCACGGGTTTTTATTGTG--------CT-
-CCTGGAAAAACTACGGTCT--TCC-----------------------------------
---ACAAGGTTAGAGC--------------------------------------------
---------GTTCTAGT------------TACCTGTTAATTGTGGCCATAACTCACATTC
ACGTCCGCATTCAGTGCT---CT-CATTTTTAAG---------ATAT----GTTCTTT--
TCTCTGTGTTTTCTGTTCTGTT-----CTTTTCCG------CTACGGCATTCATATTTTT
ATGAGGCTGT----------TCCTTCGG--CCGGGCCTGGCATA----------AATTAT
TTGAATTTG-TTTTTCCATTTGCTCTGAAATTGTCCATTATTGGAAA-------------
------------------------------------------------------------
------------------------------------------------------------
------------------------------------------------------------
------------------------------------------------------------
------------------------------------------------------------
------------------------------------------------------------
------------------------------------------------------------
------------------------------------------------------------
------------------------------------------------------------
------------------------------------------------------------
------------------------------------------------------------
------------------------------------------------------------
------------------------------------------------------------
------------------------------------------------------------
------------------------------------------------------------
------------------------------------------------------------
------------------------------------------------------------
------------------------------------------------------------
------------------------------------------------------------
------------------------------------------------------------
-----attattttatGGCGGAT--------ATCATGGCAGTACAATTTGCTCGGCATTTT
TATGGCATGGCCAATTTTTGCACAGTGTCT-AGGCCTTT-----CCTTTGCCAATTCTGT
TACCCGTCTTGTCTCGTCTC---------------CCACTTTC--TGCAAGGGAAGGGAA
TAAAGATAGAGGCCCAGCCCTCCGTCCAGTAT---TCGCCATTTACTTCCCATGATGACG
GACATAATCAGCGAGATCGGATCGGCGCTTTG--TGCGTGCA-AAATGTGCAATAAAGCA
GCAACAACGGGAGGATCGCTAGAGGCTTCGTCTTCGTCTTCGGCTTCGGCTTCCCGGTAT
TTATT----TCGCAG-------------------------------------CGAAAGGC
CAGAAAGTGTTC---TTG-------GATGGA------GTGTTGAGGCCG-------GAC-
-----------AATGGC---------------CAGG------GGCAGGTACTGATCCTCG
ACAGTGCAACAGC-TC---GACACTTTCGCCTG-GT--GAAAGG----------------
-----------TC---------------------TGCCATAAAGGGTATTTACTGTCGCT
GCCGCAGTGTCGCCCTGAAGCCATGGCTGGGCCGGTTGAAGCTGcaactcaactcaactc
aa---ctcaacccaatccaaAAAGGGACACTCTCGCGGA---CAC---------------
-----------ACAG-AGTCAAA--GACAATGG-TGGC--------ACAATAGGCAAGGT
TGT-------GGGTAGGGT------------TCTGTTCT--GTTCTGGA--CGG------
---------------------------GTCGTGTCG-------------GGTCGGG-AA-
GGCTTGCAC-TGGGCCTTTTCCAGTGCG-GCCAAGAGAGGAGA-TCGCTCCAGGTAGAGC
C---TCTGGCGAGTTAATGCTAATGCAAATTGC-GGCGCAATATAACCCAATAATTTTAA
CTAACTCG------------------------------------C--AATGGACAG----
------------GgcagtagagcagtagagcagtagagcaTTGCAG------GAAGGATG
CAATACTCGGGAATGGAATGCATAACAATGGG-----------------CAAGGACCAGG
G---------------TTCCGTTTCGCGAGATGAggttctttgacggttctt---tga--
-----cggt----------tccttgacggttcCCTGTGT--------------GCTCTCT
GCTCTGT-------------------GTTAATCCG-TTTGCCATCAGCAAGATTATTAGT
CAA---TTTTCATATTTCCAGTCGAGTCGCAGTTT-------------------------
-------------TG--GTTTCACTT---TCCTCCTT-TGCCACTTCTTGCCTTGCCTCA
TGTGGAtgccgatgccgatgccgttgccgttgccgttgccgACCGACGAGTTAGATTTTA
TTGCAGCATCTTG----AACAATCAAC---------------------------------
----------TGGA-ATTTGGTAACATGCTG---------CGCGG-------CCTAACCC
TGG--AGATTGCTCTACTTTC---GCCTCAATTGAATCGGAGTTAGGCGGAAGACGGCGG
ACCCT----TGC------------------------------------GACCAAGGGTTG
TCTCCTGGCCTCA----GGAGTTTCCA------CAGTCAAC------GCTTTCGCTGgtt
tgttt-----------atttgtttgtttgtttTAGCCAGGATTA----------GCCCGA
GGGCTTGACTTGGAACCCGACCAAAGCCAAGGGCTTTAGGGCATGCTCAAAAGATCCCTA
TATCCCTATCCCTGTCTCG------------------------ATCCCTAAACCGATCCC
ATTTGGCAATTTCATTAGAAAGTCATAAAACACACATAATAATGAGATGTCGAAGGGATT
AAGATTAAGGGACG-----CACACA----------CAGGCAGCAGGATTAACGGACTAAC
GGAATCGGGTTA-TTT-----------TTTGC-------------------------GCT
CAACCGGACGGAGCTTAACGCTAAGCCACAAGCTTAACCCCTTGTGGGCCG--C------
GGCAGGTAAATCGATGACCGATGTCGCTTG-CGCAAGGCC----------CCTACT----
-------------------------ACTCCC---CTCCCATAT--------GACACCCCA
CTAACCCTGCCCCCG--CCATCTCCA-------CCACCACTGTACTATATGT--------
----------------------------------ACAGTTGCCTC-CTCTCTG---GATG
ATTATATCATCATAATAAATGTTTTTCCCAACGAAACTGAAACCGAGAAACTTTTCAAAT
TAAGTTCCGA---------------------------------C----------------
-------------------CCGCC-GCCCCGC-CCC--CCGAAATTGTGCT---------
----------------------------CCATTATCATAGATATACTG-------CCTGG
AAAATGGTAATG--CGAATCCCCCTCTACCAGTGCCCCCG-CCAACGCTGGTGGGTGGTG
T----------GGTGTG-GTGTGGCA----------------AGTGTGAGGCCGTTAAAC
GTGCTGC--ATTATATTAAGACTTCATAAAAGAGCAAATAATTC-GCTGGGCA--AGCAT
CGATCGATAAATGCTACTCTATGTACCCCCGTGAACA-----------TGTAT----GTA
CATGGCTATGGCTA-TGGCATCCATGTACATATGTATGTACATAATGGGAGTTGGTGAAA
GCAACCAACCACCCTACCATCCTGTACT----------CTCTTCCTTACTCCTTACTCCT
C------TCCGGACTGCTGGGCA-----------------------GCATTATACCATAT
CATACT------TGATGAAGCCGATAAAGTCGCATTATTAAGGGGGCACCT-CACGTCTC
GCTCGCTCTGGGGCGTCCGCCTGCTTGCGGACAAGCGAAACAAAAGATTCGCTCATCCGC
TATGAATACC--AAATTC-----------CTCTCTC----TTGCCGTGCACACAAagaga
gagagatggagagagagagagagagcgagc---------gagcgagcgagCTCCATGATA
ACTTGATTATGTTCT--------------CCGCC
>droVir3 .
------GCTTATGCTGCTTGTTCAATTATTGCCCATGCGTGCTGCCACTAGG-TTTGCAT
ATTGTTGCACACGGACAGCGTCTGCTTGTTTTGAAACGTTACGAATGCGCGCTTACGTCG
CC-C------TTGCATGGGCGCG-TAATGAATGAAGTGGAATTTCTTTGAGTATTTTTGG
GGTGGTTTTGAGGAAGCTTTAAAAAT--------CGATATGTA-------AACAAA--AA
TCCACTTA---TATATGTATAAAAAGGAGTT----------------AGGTACTAAATAA
ATACATTT---------------AAATGCACTACAAAT-----TT---GTTTTAATAAGG
ATTTTTTAAGATT----CGAGTAGGC-----CATAT--CGAAGCGT------------TT
CAA-----T-----------------------------------------AGTCA-----
AAAGTGACTATAGTATACTTAAAGCCC----GATGTGTTTAGCCACATTTGAAGA-----
-------------------GCAC-T-CTCTCTTTTTTGACCCACTCC--------CAGCC
C------GAAG-TCCCATTAA---GCTCTGCTTAGTAAAAAATTAGCACATGCTTAACGC
A--------------------CAAGCTGGG---CACGT--CCTG----CGAGCAC----A
A-----------------ATAATTTCTCAATTGCTTTCTT---------CTACTC-----
GTCGCATTTCGAGGCCCAATTAGTGCTGCAGTAGGCATTGCAAATGCGTGCCCACAGATC
GTCTAATCCGGTGCCA-----CCGGG-AAGCAG---------------------------
-----GATCTCT-TGG--------------------CTAAATGTTGACAAATACAACACC
-----------------TACGATACAAATAAAATTGCTACAGAAGTACCACCTAAAACGT
AG-------CAGCCAAAGGCC------TAACCGGAACGATATGATTTTCACAAATTTA--
-C-G--CCAAGC-----------------AAAACCCAA-------CGGCAGGAC------
-------------------TCGCCGCCACCGTTGC-----CTTTGGTCCTGCGGCGCACA
CAGGATCG------------C-ATCGTA--------------------------------
--------------GTTGGGATCGGT--TCCGAATCCGAAACCG-AAACGGTCTCCGCTC
CACTCACCGTGGCTAA-TTGCTCATGAATAAATTG-TTCGGTTTTC---------GAATT
CCATTGAAACTGCGTCGAtctctctctctc--------------tctccttct---ttgg
ctctccctat----cttctctcact----cG----------CAGCGAGTCCTGCGGA--G
CAACCAAAATATTATGGTGTTCCCTGCTGTTAGCGCACAGTGAGCGCGAATTTGCTGCGG
TA--AGTCGATGCTG---------------------CTTTT---------------TCT-
TTGCCGAG-TCCTGA------------GTC------------------------------
-----------------------------------CTGAGTGTCCTTTC---TGCTGCTT
GGCAGGACCTCTGTCGTCGGTCTGTCAGCCTGTGATTTGACATGTTTGTTAGCTAG----
----GCCTGACCCTGAGTT-----------------GG-------TGTTCCACTTTGATG
TGATTCGTCAATGCGGTGGACTACCGGCTACC---------------------------G
A--C--TGCAGA-CG-----CAGATTCCT-------------------------------
--------TTGGCCCGAAGA-------------CTCTGGAC-CTGCCCCAGCAGGCATCT
CACGAGCATGCGGATGCCCAACAGCGTTTGTTGGCGTATCT--GTGTCG----CAGGTTT
CTCTGTTTATTTGTTTGTTTGTGCCGC-TGTCTCCT--------------GTT-------
-----------------GCCGCTGGAGTGGC---------------------------A-
--TTCG--CTAGGCTCGGCATGGGCCACCAAT-------CCGGCGAACCTCCCGTCGGCA
CGCATACCGCAATGCGCCGTATTTATAGTAAACGTAGCCGATCGATT-------------
---------------------------------------GCGGTTCCGACTAGCCATATC
GAGATTACCACGGAGGAC------------------------------------------
------------------------------------------------------------
------------------------------------------------------------
------------------------------------------------------------
------------------------------------------------------------
------------------------------------------------------------
------------------------------------------------------------
------------------------------------------------------------
------------------------------------------------------------
-------------------------------------------------------CCCTA
AAAAAGAAACCGCATGATTATGCG----C-CCACACAATATCCG-ACAATGGTTC-----
--ACCTAATTATTTGGCTCG----------------------TGCTCTGCTCTGtttttt
tttgttttgttttgtttttttg-tt---tGT-----TGTCGACAAAAAGCGAGCCAA--T
TTTT--------AAACGATTTGTCTCTCTTTTTATGAGTTTTTT--------CCATTGTG
CG-CATTTTTA----------------------GCTGT-------GTTCG------CTGC
TCTACAAACCTCCTAATTGCGGCAATTG--------CCGAGTCCTT--------------
-CGCGTTC----------------------------------CGCGTA-CGTCG--TGCG
---TCCTTTTTATTGAGCGCTCGCATTTCCACTAAAAATTGTGCCAT-TCCATTCTTAGC
CAGGTAGTTGCCGC----------------------------AGACGCGCCTTTTTATTG
GTGCACCTTCGGCGAAAATCGGAGTG--ACAACCGCAGTCCAA------------CGGCG
AG----------------------------------------------------------
------------------------------------------------------------
-----------------------------GGTATGGGCT----CGTTTTGGTACCATTTT
----------------------------------------------TCTGTTGTT---TG
CGGCAAAGAAATGGTTCA-GGAA-TTAT--------------------------------
-GG-----TATATGCAGATTTTTATGGGC----CGT---GCGCTGT--------TTCGC-
GGAATT--------CCGT--CCGTGTCCTGTTGTG---------------CATTCCGAGG
--------------ACCCGTAT-TTAGGAATGTAGATCAAAG--TTTTTTGTTTTCATTG
TGGCATTTTTTCGGCTGCGCTA-G--TTTTTTTCCCCGAAGC----------CCCTGTAC
CG------GAATGCTCTAATTTTTTAATTCTTCACGCGTTTTTA----------TGACC-
-GCCGGAAAAA-------CA--GTGGAAAAC-ATGAAAAT--------------CGTTTT
C-CACAAGGTTACTTAGCACCATTTATACAGAGTCCGCCTCCGCCTCCTGCTCTGCCTCT
GCCTCTGCCACTCTACT------------TACCTGTTAATTGTGGCCATAATTCCCAA--
--------------CGTTCAGCCACATTTTTAAG---------ATAT----TTT------
----TAT-------------TAGGGCGTG-------------------------------
------------------------------------------------------------
------------------------------------------------------------
------------------------------------------------------------
------------------------------------------------------------
------------------------------------------------------------
------------------------------------------------------------
-------------------------------------------------------TGCTG
CGCTTCCTAGGGCCCAT--ACCCTTACACCCCATGACCC----A--GCCCCCTGTGCACA
CTGTTTTGGCTTGATTGACGCTGATAGGGCACGTGTTGGCAATTATTTGAGCATAAACAT
GAAAAGCT--------------------TCTTCTGGTCAAAT------CAGATGAC----
-TTCTTGTTGAGCACGCCAA-----ACAGGCTCTCA-----GCGTGACT----------T
ACAGACT----GCCTTA----------------------ACAAATTGGT-----------
----------------AT------CATTAA------------------------------
---------AAT---------TTGGCCAGAA------ATGTTTA----------------
----TTAAAAA-AATATTAAGTTCGT---------GAAGCTCAAGAGCT--AGC-CATTG
ATCACTTTGCT-----AATTGA------AATTCAGTTT----TTCAAATA---AAAAGTA
TATATATATA--AAATCTCTATG-------------------------------------
------------------------------------------------------------
------------------------------------------------------------
------------------------------------------------------------
------------------------------------------------------------
------------------------------------------------------------
------------------------------------------------------------
------------------------------------------------------------
------------------------------------------------------------
----------------------------gtgtgtgtgtgtgtgtACTTCCCATAATCA--
-GCATAATCAGCGA-----GATCGGCGCTTTGTTTGCCAGCACAAATGC-CAATAAAATG
GCAAAA-------GAGcaacaa---caacaacgacaacaacaaAAGCGACTTCCACGTAG
TTAGG----TTTCAGGC------------------------------------------C
--GAAAGTGTTCAACTTG-------GCTTGGACTATGG----TTGATCG-------GTT-
-----------GAGGGT--------------GAGGG------GTCAGGT-----------
--------AATGC-TG---TTCACTTTCGCCTG-GCGCGAAGTGAA--------------
--------AGGTTAGAGAGTTGGCTTGGCCCGACCACCATAAAGGGTATTTACTGTCGAT
GCCGCAGTGTC--------------------GCGTTTAT--TTGCACTTGGGCCCA-GGC
AAAAGGTTGCT----------------CATTCTG--------CATGGACAACGGACAGAG
GACAGAGGATCGCGG-CGGGTGA--AACAAAAGCGC--CTGAATGCACAATAGGCAAGGT
TGT-------GGGTAGGGTTCGACGG-----TGGGCA---AGGCTTGGG-----------
---------------------------CTTGGACAA-------CGAC---AGCAG--CA-
GAGACTCTGG----------CCAGGTCG--CCGGGCGTTCAGG-TAGAG-C-------GG
CATTC--GGCGAGTT------AATGCAAATTGC-CGCGCAATATAACCCAATAATTTGAA
CTAACT--------------------------------------C--AACGACTGG----
------------G----------------------AG--------A------G-------
--TTACTTA-----GTAATGCATAACAATGAGCGCAGTTGAGGCTGAAACTGAAATTGAA
ATGTTTGATGCCAA--G----------------------------GGTTTTGGCATTGAC
TAGAACTCG----------TCCTGG--------TCTGgt--------------gtcctgt
gtgctgt---gtcctgtgtcctgtgCGTTAATCCG-TTTGCCATCAGCGACATTATTAGT
CGA---TTTTCTCA----------GTTTGGCTCAG-------------------------
------------------TTTCACTT---TCGCC----TTGCGGATA-------------
----------------------------------------------CGAGTTAGATTTTA
TTGCAGCATCTTG----AACAATCGCT------------------------CGAACTTGG
-AACTGAATATGGA-TTTTGGACACATGCTG---------TGCTGCGATTGCTCTAGTTT
AAG------------GCCTAT---GGCTAAGGTG------ATTTAGGCCGAAA-T-----
----T--TTCAT-----TGTCTTTTACTCAAGCT--------------GACC--GGGTTA
-----C--CCTCA----GGCAGC-------TTTTCGACT----------TGCCG-GACTT
TCCACAGGCCACAACATTTTGTTTATTTGTTT--AT------------------------
------------------------------------------------------------
----------------------------------------------------CTGATCCA
--CACGCATTTTCATTAGAAAGCCATAAAA-ACGCATAATTAT--GGCA--ACAGGGATT
AGC-----CACACG-----CACATATATGTATATGTATATGACATAATTAGCGGATTCTG
-AAATTGGGTTA-TTT-----------TTGTCCTCTTTTTTCTTGG-----------CCC
AG-----------CTTAACCCTAAGCCA-------AACCCAAGCCTAG---------CCA
AGCAGGTAA------------------CGGCCAGGCGGACAGCTCAATAGCTTACGCAAG
CAAAACAAAAGTCAAATAAAGAAAAACTTTCAAGTTGGCAGCACTTTAGGTACCACCCCC
CCACCCCCACCACCAATCCGTCGCCA----------GTGCTGCCCCATGTAA--------
----------GTGCGC-----------TGTGGGTACAGTTG-CGC-CTTTAGGCAACATG
ATTATATCATCATAATAAATGTTTGCCGCAACTAAACTG--------AAACTTTTCAAAT
TAAGTTTCAACAACTGCGCCCCC-AA----------AAGTATTT----------------
-------------------CATTG-TTTATGCATGT--GCGGCtgtctgtgtgtgtgtgt
gtgtg------------------tgtgGGCGTTGTC-T----------------------
------------------------------------------------------------
-------------------------------------TGGA-AGTGTGAGCCCGTTAAAC
GTGCGGCATATAATATTAAGACTTCATAAAAGAGCAAATTATTTGGCT-GCCT--GTG--
-GATCGATAT-----------------------GGCA-----------------------
------------------------------------------------------------
----------ACCT----------CCTC--------------------------------
-------------CACCAGCGCTCGTTCTCCATCTCGGTCTGT---GCATTATGCCATAT
CATTCTTTTGCCTGATGAAGCCGATAAAATCCCATTATTAAGGGGGC-CACTCACGTCTC
GTTCGCACCCGTGGCGCTGCCCGCTTGCGGACAAGCGAAACAAAAGATTCGCTCATACGC
TATGAATATATGAAATCG-----------CACTCGCC---TCCCA-----CAGACTGACA
GAGCGAGAGCGAGAGCAAGA------GAGC---------GA--GA---------------
------------TGCTGCTGGCGCTGCTGCTGCT
>droPer1 .
ACATCCATTTCCCAGGGTATGCAAAATGTTGCTCAA---TCCGCGCAATGTT-GTGGAAC
AATGCTGCTCGAT------------TTCACGGCACATGAGTCTGGCCCATACAAAT----
-------------------TTCG-AGGCGTGTAAAAT--AGAGTGGACAAGG--------
--------ACATG-GAATGTAGCAAA--------TACATTGGA-------TGTTAC----
attattat-------------ttgaattt------------------a------atattt
a----ttt--------taaattttaatatttCGTGCAA-----TTT------TTTTTG--
----TTAGGGGTT----CATGTATGTTAATTGATGTAA----------------------
---------------------------------------------------AACA-----
ATT----------CAAAATCCTATCCCAATGAATTGAATT----GTATTGTATA-TATGT
ATGTAATTAAAGTAATTCTACTCGT-AATACGGTGCCCTCC----TCATGGTACTGATTA
TTTCGATCCTA-TCTCATTTATGCGATCTGTTGAGTAAAAAATTAGCACATCCTCAGCGC
AGATAAACGCATCCTTAAAACTGCCTTTTG---CCTCT--CCCA----CTCCTCT-----
--------------------------------GTTTCCCTAACTATCGACCATGCAGAGT
GA----------AGCCCAATTAGTGCTGCAGTAGGCATTTCAAATCCGTGCCCACAATTC
GTCTAATCCACTGCCACCGACCTGCCTGTACCGCCCATGTCCGTTCCACTCCGTTCTGGT
CTGTGAAGGATC-GGATCTGGGCCTAGTCCT---GGCTAAATGTTGACAAATACAACACC
-----------------TACGATACAAATAAAATTGCTACAGAAGTACCTCCCAAAA---
--------------ACGGGCACTGTCCCGACCGGAACGACTCAATTTTCACAAATTTACG
CCAAAACCAG-------------------GAAACAGCAAA------AGAAACAGAAAC-A
GACTCTAAAAGATTGCTCGACGTCGCCACTGAAGCTGTGGGTTTGCTCCTGCAGAGC---
-AGAGTC-------------CAAATTCGAATCGGAGTCCC-------------AGTCGCA
GAGTCCTGCGAGTAGCCAGAGTCCTGTAGCTCACT-------CGAAAAC--------CGC
CACTCACCGTGGCTAA-TTGCTCATCAATAAA--GATGCTAGCTGTGCAGGGCTCGGATT
CCATTGAAAATGTTTGCATTGC--CCAGAT--------------TCTCCT----------
----------------CAACGCTCCTCCGAG----------TCCAAGTCCATGTCCGTTG
CAACCAAAATATTATGGTGTTCCCCGCTGTTCTCGCACAGCCAGCGCGAATTTGCTGCGG
TA--AGTCAATGCTG---------------------CTTTT---GGG---------TCT-
CGTTCTCGGCACGGC------------ATCTCCTTG------TCCTTTTG--------CA
TCTATGGGTATCTT--------CTGGCAGCGCTCCTTTGGCGGCACTGT-----------
-------GTCCTGTCGTCG--TTGTTTTCCCGTGATTTGACATGTCTGTTAGCAGGATGC
CGTTGCCTGACCCTGAGCTAGA-----GGACCC---TACG-----TGTTCCACTTTGATG
TGATTCGTCAATGCGGTGGACTACT-GCTACCG-actcttggcac----tcttggcactc
ttgg--cactG--TG-----TGTATGTGT-------------------------------
--------CCTCTGGTTT---------------CTATT--TTCTGCAG------------
TCTG------CGGCTTTCCAGCAGTGTTTGTTGGCGAATCT--CTCCGT-----------
--------------TGGCTGGTACT-CTCCTGCTCT--------------CCT-------
------------------------------------------------------------
--CCTG--CCAAAAGATGCATTCGTCACAGTT-------GAAACTGG------ATTG-GT
CGCCCACCGTAGTGCTCTGTACTCATAGTAAACGAGTCCGATTGATT-GGCCACCC----
------------------------------------------------------------
------------------------------------------------------------
------------------------------------------------------------
------------------------------------------------------------
------------------------------------------------------------
------------------------------------------------------------
------------------------------------------------------------
------------------------------------------------------------
------------------------------------------------------------
------------------------------------------------CATTGATGATTG
TACTCC-AGTTTCCAATTCCCTAAAACCAGAGACATGCCATAAGA---------TCC-TA
AAAAAGAAACCGC-TAATCATTTC----GCCCACACAAAGAGGGAACAATC-CTCTGGCC
AAACCTAATTATTTGACTCAATTGTGAGCCCC--G-------GGCTCGTGGACACTTTTT
GTGGCC--------TCTTTTTG-TTCCCTACACGACACTCGAC-AAAAGCGAGCCAA--T
TTTTTTTTTGTGGACCACTTTGTTGCTCTTTTTATGAGTTTTTTCCATTGTCCCATTGTC
AC-TTTTTCCACGGCCTGTGCTCCGACCTGGCAGCGAT-------CCTCGCTG---CTGC
CCTACAAACATCCTAATTACGGCAGTT------------AGTCGTTGTTC---------C
AGAAGGGA----------------------------------CCTGGA-CTACA------
-------GTTTATTACGCGCTCGAATTTCCACTAAAAATTGGACCGAA-------AAAAC
TAGGTAG-------AGTCC--CG-------------------GGACGCGCCTTTTTATTG
GTGCACCTTCGCCGGAACTGAGAGCGCGACGACCGCAGAACAACGGCGAC-----CGGCG
ATGAGGATGCTGCTCCCGAGGATGCATCCTGGCCATGGCAGGACGACGATGACGACGACC
TCG-CTGC-ATTAGAAAAC-------TAGATCAGTTTTTTG---------TTCTA-----
----ATTTTTGTGCCCT-GCTCTGCTCTCCTTATG-CTTTATTGTTTATGGTCCATTTCC
--------------ATTTCCATTTT----------CATTT-CCACTCCCATTGTTTGGCC
GCAAAACAAACTCCGGACGGGAA-TTAT--------------------------------
-GGTATGGTATATGCAGATTTTTATGGGCACTCGGGT--GATCTAG--------TTCGC-
GGA-----------ATGGGCGCGTATCCTGTAGCGCTGGGACCTCGAC--CGGCCCTCGG
AGGATGTCTGTATGT-CTATA--TTAGGAAAGTAGATCAAG---TTTTTTGTTCCCTTTG
TGCGCTTTTTTC-GCTGCGCTA-G--TTTTTTTCCCCGAACG----------CAGCA---
--------AACTGCTCTAATTTTTTAATTCTTCACGGGTTTTTATTGTG--------CT-
-CCTGGAAAAACTACGGTCT--TCC-----------------------------------
---ACAAGGTTAGAGC--------------------------------------------
---------GTTCTAGT------------TACCTGTTAATTGTGGCCATAACTCACATTC
ACGTCCGCATTCAGTGCT---CT-CATTTTTAAG---------ATAT----GTTCTTTTC
TCTCTGTGTTTTCTGTTCTGTT-----CTTTTCCG------CTACGGCATTCATATTTTT
ATGAGGCTGT----------TCCTTCGG--CCGGGCCTGGCATA----------AATTAT
TTGAATTTG-TTTTTCCATTTGCTCTGAAATTGTCCATTATTGGAAA-------------
------------------------------------------------------------
------------------------------------------------------------
------------------------------------------------------------
------------------------------------------------------------
------------------------------------------------------------
------------------------------------------------------------
------------------------------------------------------------
------------------------------------------------------------
------------------------------------------------------------
------------------------------------------------------------
------------------------------------------------------------
------------------------------------------------------------
------------------------------------------------------------
------------------------------------------------------------
------------------------------------------------------------
------------------------------------------------------------
------------------------------------------------------------
------------------------------------------------------------
------------------------------------------------------------
------------------------------------------------------------
-----attattttatGGCGGAT--------ATCATGGCAGTACAATTTGCTCGGCATTTT
TATGGCATGGCCAATTTTTGCACAGTGTCT-AGGCCTTT-----CCTTTGCCAATTCTGT
TACCCGTCTTGTCTCGTCTC---------------CCACTTTC--TGTAAGGGAAGGGAA
TAAAGATAGAGGCCCAGCCCTCCGTCCAGTAT---TCGCCATTTACTTCCCATGATGACG
GACATAATCAGCGAGATCGGATCGGCGCTTTG--TGCGTGCA-AAATGTGCAATAAAGCA
GCAACAACGGGAGGATCGCTAGAGGCTTCGTCTTCGTCTTCGGCTTCGGCTTCCCGGTAT
TGATT----CCGCAG-------------------------------------CGAAAGGC
CAGAAAGTGTTC---TTG-------GATGGA------GTGTTGAGGCCG-------GAC-
-----------AATGGC---------------CAGG------GGCAGGTACTGATCCTCG
ACAGTGCAACAGC-TC---GACACTTTCGCCTG-GT--GAAAGG----------------
-----------TC---------------------TGCCATAAAGGGTATTTACTGTCGCT
GCCGCACTGTCGCCCTGAAGCCATGGCTGGGCCGGTTGAAGTTG-----caactcaactc
aa---ctcaacccaatccaaAAAGGGACACTCTCGCGGA---CAC---------------
-----------ACAG-AGTCAAA--GACAATGG-TGGC--------ACAATAGGCAAGGT
TGT-------GGGTAGGGT------------TCTGTTCT--GTTCTGGA--CGG------
---------------------------GTCGGGTCG-------------GGTCGGG-AA-
GGCTTGCAC-TGGGCCTTTTCCAGTGCG-GCCAAGAGAGGAGA-TCGCTCCAGGTAGAGC
C---TCTGGCGAGTTAATGCTAATGCAAATTGC-GGCGCAATATAACCCAATAATTTTAA
CTAACTCG------------------------------------C--AATGGACAG----
------------G--------GCAGTAGAGCAGTAGAGCATTGCAG------GAAGGATG
CATTACTCGGGAATGGAATGCATAACAATGGG-----------------CAAGGACCAGG
G---------------TTCCGTTTCGCGAGATGA-----------GGTTCTT---TGA--
-----CGGT----------TCCTTGACGGTTCCCTGTGT--------------GCTCTCT
GCTCTGT-------------------GTTAATCCG-TTTGCCATCAGCAAGATTATTAGT
CAA---TTTTCATATTTCCAGTCGAGTCGCAGTTT-------------------------
-------------TG--GTTTCACTT---TCCTCCTT-TGCCACTTCTTGCCTTGCCTCA
TGTGGAtgccgatgccgatgccgttgccgttgccgttgccgACCGACGAGTTAGATTTTA
TTGCAGCATCTTG----AACAATCAAC---------------------------------
----------TGGA-ATTTGGTAACATGCTG---------CGCGG-------CCTAACCC
TGG--AGATTGCTCTACTTTC---GCCTCAATTGAATCGGAGTTAGGCGGAAGACGGCGG
ACCCT----TGC------------------------------------AACCAAGGGTTG
TCTCCTGGCCTCA----GGAGTTTCCA------CAGTCAAC------GCTTTCGCTGgtt
tgttt-----------atttgtttgtttgtttTAGCCAGGATTA----------GCCCGA
GGGCTTGACTTGGAACCCGACCAAAGCCAAGGGCTTTAGGGCATGCTCAAGAGATCCCTA
TATCCCTATCCCTGTCGCG------------------------ATCCCTAAACCGATCCC
ATTTAGCAATTTCATTAGAAAGTCATAAAACACACATAATAATGAGATGTCGAAGGGATT
AAGATTAAGGGACG-----CACACA----------CAGGCAGCAGGAT------------
------------------------------------------------------------
------------------------------------------------------------
------------------------------------------------------------
------------------------------------------------------------
------------------------------------------------------------
------------------------------------------------------------
------------------------------------------------------------
------------------------------------------------------------
------------------------------------------------------------
------------------------------------------------------------
------------------------------------------------------------
------------------------------------------AGTGTGAGGCCGTTAAAC
GTGCTGC--ATTATATTAAGACTTCATAAAAGAGCAAATAATTC-GCTGGGCA--AGCAT
CGATCGATAAATGTTACTCTATGTACCCCCGTGGACA-----------TGTAT----GTA
CATGGCTATGGCTA-TGGCATCCATGTACATATGTATATACATAATGGGAGTTGGTGAAA
GCAACCAACCACCC----------TACCATCCTGTACTCTCTTCCTTACTCCTTACTCCT
TGGTCCGTCCGTACTGCTGGGCA-----------------------GCATTATACCATAT
CATACT------TGATGAAGCCGATAAAGTCGCATTATTAAGGGGGCACAT-CACGTCTC
GCTCGCTCTGGGGCGTCCGCCTGCTTGCGGACAAGCGAAACAAAAGATTCGCTCATCCGC
TATGAATACC--AAATTC---------CTCTCTCTC----TTGCCGTGCACACAAagaga
gagagatggagagagagaga------gagc---------ga--gagcgagCTCCATGATA
ACTTGATTATGTTCT--------------CCGCC
>droMoj3 .
------------------------------------------------------------
--------------------------------------------------ATAAAAATCT
Gt-a------tattatattttta-tattgaaaaaattttaatatatatattcatt-----
--taattt----atatCTTaaaaaac--------atataatta-------aaaaaa--aa
agtgtaaa---aataaaaataataataTGTC----------------a------aaatat
ataatttt---------------atatatttattaagt-----tttgaatttaaataaat
aatataaaataat----agaataaa------cgtac--ttaactttatttaattataatt
aaa-----t-----------------------------------------attCATTGT-
ATAGCAAATATTAAAGAGTTTTAAACC----AATCTTCTTATTGTTTTTATATAG-----
-------------------ATAC-TAATCTCCTTTCAGCCATGCTCCTGCAT-ATTATTC
CTCTCAAAAAG-TCTCATCAA---GATCTGCTTAGTAAAAAATTAGCACATCCTTAACAC
A--------------------TACTGTTTA---CACTTAACTCA----CTATCCC----A
CTCTCCTTCTCTGTCTCTATAATTTCTCAATTACCTTTCT---------TCGCATTGA--
GTCCCATCCCG-GGCCCAATTAGTGCTGCAGTAGGCATTGCAAATGCGTGCCCACAAATC
GTCTAATCCGGTGCCA-----CTGGG-GAGCAGtgcgagctgcgagctgcgagctgcgag
ttgc-gagctgTGTGA------------------GCCTAAATGTTGACAAATACAACACC
-----------------TACGATACAAATAAAATTGCTACAGAAGTCCCACCTAGAACGC
-------------------TC------TAACCGGAACGACTTAATTTTCACAAATTTA--
-C----------------------------------------------------------
------------------------------------------------------------
------------------------------------------------------------
--------------GCCAGGATGCAG--GACGACT-------CG-ATCGGGTCTCCTCTC
CACTTACCGTGGCTAA-TTGCTCATGAATAAATTGTTTCGGTTTTC---------GAATT
CCATCGAAAATGCATGGACTGCT-TCGCTC--------------TCTCTGTCTGACTTAC
ATATGCCTA-----CTTCGCTCTAG----CG----------CTGCGAGTCCTGCGGA--G
CAACCAAAATATTATGGTGTTCCCTGCTGTTAGCGCACAGTCAATGCGAATTTGCTGCGG
TAAGAGATGTTGCTG---------------------CTTGTTCCTCA---------TCT-
TCGGCAGG-CTCTGC------------ATCGTCCTGCTCGTC------------------
-----------------------------TTCTCGTTGAGTGTCCTTTT-----CTGCT-
--------CCTTGTCGTCGCTCTG------CGACATTTGACATGTCTGT----TTG----
----GCTTGACCCTGAGTT-----------------TG-------TGTTCCACTTTGATG
TGATTCGTCAATGCGGTGGACTACCGGCTACC-----------------GCAGACTCCAG
A--C--TGCAGATTG-----CAGACCTCTCAACCTCAACTTCAACTTCGACTTCGACTTC
GACTCGGCCTGCCCTAAGGATTCCCAGTCTGCGCTCTGACC-CTGCAGGAGTCAGCGTCT
CCTGC-----CGACTGCCCAACAGCGTTTGTTGGCGTATCTCAGTGTTG----TTTGTTT
GGCTGCCTGTCCGTTTGTTTGTGCCGC-CGTCTGCT------------TGTTT-------
-----------------GATGCTGCACTGGCATTCGTTCAGCTCCGCATGGCCACCATG-
--GTCG--GTGGGTTTTGAGTTGGTTTGAATT-------CCATTCCACCTCCTGGTGGTT
CGCATACCGCAATGCGCTGTATTTATAGTAAACGTAGCCGATCGATT-------------
-----------------------------------------GCGGTTCTGCTTGGCCATA
TCACAAATG---------------------------------------------------
-----------------------------------------------------ATATAAA
AAATTCCAGTTAATTTCTTCTATATAATGTATA---------TATATA------CATAAA
TAT---------TTTACTGTGATGCAAG------TGATATATACTTAAGATACAA-----
TATAAAA-GCGCATCCTTTCAT----------TCCTACTA--------------------
----------TAATAGTGATATGATATATGGT----------TATC------------CA
TCATACTACTTTCAATGTGTAATCCATAATGAAATCCATCAA--TATGCTTATTTATGCA
AATTTCCAGCCATA--GATACAATAGTATCTCAAAGATACTGAGTAGCT----TTTTA-T
TCACGCACTTCTGCCGCTGCCCAGGTACATCTCTCTAACTCTCCCT--CGTTCCCATTT-
--CGCC-TACTTATCCGGCCATTCAGCAACTGCCGTCCACTGCCAGCTTCCCGATCCCTA
AAAAAGAAACCGCATGATTATGCG----C-CCGCACAATATGCA-ACAATGGCTC-----
--ACCTAATTATTTGGCTCG----------------------------------CGTTTT
TTTGTT--------CGTTTTTG-TT---CG------GGCCGACAAAAAGCGAGCCAA--T
TTTT--------AAACGATTTGTTTCTCTTTTTATGAGTTTTTT--------CCATTGTG
CG-CATTTTTA----------------------GCTGTTTAGCTGTTTGG------CTGC
TCTACAAACCTCCTAATTGCGGCAGTT---------CCGACTCCTTGTCC--CTGGCTGC
CCTAGCTG----------------------------------CAGGCAGCGTCG--TGCG
CGTCCCTTTTTATTGCGCGAACGCATTTCCACTAAAAATTGTGCCAT-------------
--------------------------------TTAGGTAGACGAACGCGCCTTTTTATTG
GTGCAACTTCAGCCGAAAATTGTGCG--ACAACCGCAGCCCAACAGCGA-----------
------------------------------------------------------------
-----------------------------------TTTTTGGTAAAGATTTTTGA-G---
-----TTTTTGGTCCCG-T---TTTGC--GTTATG---------TTTGTGGCA-------
------------------------------------------------------------
-----AAGAAATGGTTCA-AGAACTTATTTCCTCAACATATACATGTATACAATATATAG
ATG-----TTTATGCAGATTTTTATGGGC---TCGTA--GCGTCGTATGGTTCGTTCGC-
GGAATTTTCATTTGCTGT--CCATGTCCTGTCGCG---------------CATTCCGAGG
--------------A-CCGTATATTAGGAATGTAGATCAAAAACTTTTTTGTTTTCATTG
TTTCATTTTTTC-GCTGCGCTA-G--TTTTTTTCCCCGAAGCCAGAAAAATGCCGAGTGC
CGACTGCCGACTGCTCTAATTTTTTAATTCTTCACGGGTTTTTA----------TGGCCG
GGCCGGAAAAA-------CGTTTTGGAAAAC-ATGAAAACGCACAGAGCGCGAACGTTTT
CTCACAAGGTTACTTAGCACCATTTATA--------------------------------
-------------TGCG------------CATATATAGA--GTAGTC-----TCCCGG--
--------------CTTT--GCC-TATTT--------------ACCT----GTT------
----AAT-------------TGTGGCCAT-------AATTCAGTGCGCAGCCACGTTTTT
ACCAACT-----------------------------------------------------
------------------------------------------------------------
------------------------------------------------------------
------------------------------------------------------------
------------------------------------------------------------
------------------------------------------------------------
------------------------------------------------------------
------------------------------------------------------------
------------------------------------------------------------
------------------------------------------------------------
------------------------------------------------------------
------------------------------------------------------------
------------------------------------------------------------
------------------------------------------------------------
------------------------------------------------------------
-----------AAGCAAATC--------AATTCAGTTTGTG-TGCAATTATCCTAAAATA
CACGCGAAAA--AGTTGCCCAAA----------------------GAAATTTGGTGAAAA
TTATT-TT----GACAGAAATCTTTATAGAA-------TGTTTAAGAAATATTTTATTCA
A---ATATAAAAATTTCGTAA----------ATAACTGAGAGATAAATTCTCTAAATTAA
--AGAGTAT--ATATTAAAATAGCTGCACTG-----------------------------
------------------------------------------------------------
------------------------------------------------------------
------------------------------------------------------------
------------------------------------------------------------
------------------------------------------------------------
----------------------------gtgtgtgtgtgtgtgtACTTCCCATAATCA--
-GCATAATCAGCGA-----GATCGGCGCTTTG--TGCTAGCA-AAATGC-CAATAAAATG
CCAAAA-------GAGCAACA--------------------AAAGGCAACTTCCATGAAC
TGAGG----TTTTGGgccaagccaagccaagccaagccaagccgaagccgaagccGCTTC
--GAAAGTGTTC-------------GCT---------G----GTGATCG-------GTT-
-----------AGGGGTCAGAG-------GGTAGGG------GTCAGGTAC--------A
CTCATCTCAACTC-AG---CTCACTTTCGCCTG-GC------------------------
---------------------------------CCGTCATAAAGGGTATTTACTGTCGCT
GCCGCAGTGTC--------------------GCGTTGAT--TTGCTCGTTG------AAA
AAAGGTTTGCT----------------CATTCTGCCGTAGAACAAAACCACCGGACAGCG
GACACCGGACCGCGGACGGACGATGAACAAAAGCGCAGATGAATGCACAATAGGCAAGGT
TGT-------GGCTAGGGTTCGGCAG-----TGGGCA---AGGCTTGGG-----------
---------------------------CTTACACGG-------CGACTCGATCAGGTCA-
AACACACAGG----------ACGCGATG---CAGGAGCTTAGG-TAGAGCC-------GA
TGTTC--GGCGAGTT------AATGCAAATTGC-CGCGCAATATAACCCAATAATTTTAA
CTAACTCacaacgacaacaacaacagcaacaacaacaacaacaac--aacaacTGG----
------------T----------------------TG--------A------G-------
--TTACTTA-----GTAATGCATAACAATGAGAGCGAGAGACAGTGAAACCGAAATTGAA
A---TTGAAATTGAGCG----------------------------AGATCTG---TAGGT
TGAAGGTTT----------CCTTCA--------TCCAGCCATCCATCCATCCAGCCATGG
GTTTGGC---ATTGAGCTGCTTGTGCGTTAATCCG-TTTGCCATCAGCGACATTATTAGT
CGA---TTTTACAA--------AGATTTTGAGCAA-------------------------
-------------ACAGTTTTCACTT---T------------------------------
----------------------------------------------CGAGTTAGATTTTA
TTGCAGCATCTTG----AACAATCGCTGCG--------------TCAGAGACAAACTAGG
AAATTGGATGTGGA-TTTTGGACACACGCTG---------TG------TCTCTCTACTCT
CAGTCT---------GCACTC---AGTCGCCGTG------CTCTAG--------------
-----------------TTTCGCTCGACTAAGGT--------------GATT--TAGTT-
-----------------GGAATT-------------------------------------
------------------------------------------------------------
------------------------------------------------------------
------------------------------------------------------------
------------------------------------------------------------
------------------------------------------------------------
------------------------------------------------------------
------------------------------------------------------------
------------------------------------------------------------
------------------------------------------------------------
------------------------------------------------------------
------------------------CGCTCTGGGTACAGTTG-CGC-CTTTAGGCAACATG
ATTATATCATCATAATAAATGTTTGCCGCAACTAAACTG--------AAACTTTTCAAAT
TAAGTTTCAACAACTGCGCCCCC-AA----------AAGTATTT----------------
-------------------CATTG-TTTATGCATGT--GCGGCTAt--------------
------------------------------------------------------------
------------------------------------------------------------
------------------------------------------AGTGTGAGCCCGTTAAAC
GTGCGGC--ATAATATTAAGACTTCATAAAAGAGCAAATTATTTGGCT-GCCT---TC--
-GATCGATAT-----------------------GCCAAACT--GCCAGCGAGT----G--
---AG----------CGGGA----------------------------------------
------------------------------------------------------------
----------------------------------------------GCATTATGCCATAT
CATTCTTTTGCCTGATGAAGCCGATAAAATCCCATTATTAAGGGGGC-CACTCACGTCTC
GTTCGCACCCGTGGCGCTGCCCGCTTGCGGACAAGCGAAACAAAAGATTCGCTCATACGC
TATGAATATATGAAATCG-----------CATTCGCC---TCTCG-----CAGCATGAAC
GAGCGACAGCGTGAGCGAGA------GAGA---------AC--GAGCCAGA------GAG
CATTGCTAGtgctgccgctgctgttgctgctgct
>droGri2 .
------------------------------------------------------------
----------------------------------------------------ATGAATAA
TT-A------TAGCTTAGATTTGtttataaatcaaat--aaattatataattatt-----
aatGATGCCAAAAAAATT----AATT--------ACATAATTA-------ATTCAG--CA
AT--TCAA---TTTAAAAATGA-AAGATCTT----------------A------AAATAT
ACGAGTTT-CAGTTACCATTTAAAAATGTGTTTGGAATACTAATTTTAGTTTCCATAACT
ATCAGTTACGATT----TGAAAA--------TATGC--TTGAATTC------------TT
ACAACTTTC-----------------------------------------AGTTACCGT-
ATAAAAATCTTCTCAGAGCCACAAA-T----GATGATTCTAATAGCCTAGTAAAA-----
-AAAAGATAGAATGATATTATAC-T-CTCTCTTTCTCTCTCTATCTCTCCATCCTCATCC
GTTCCAAATGG-TGTCAGCTA---GCTGAGCTTAGTAAAAAATTAGCACATCCTTAAGAC
G--------------------AATGGCCAGCCTCAATT--CTCA----TTTTCTC----A
ATTTC-------------TCAATTTGTGAAATTCTTGATT---------TCA--------
GT----------GTGTCAATTAGTGCTGCAGTAGGCATTTCGAATGCTTGCCCACAAATC
GAGTAATCCTGTGCCA-----CCGGC----------------------------------
---C-GAGGTCC-TGG------------------GCTGACATGTTGACAAATACAACACC
TACTATACAAATCCAAATACAATACAAATAAAATTGCTACAGAAGTACCACCTAAAACGT
AGCAGCGAACAGCGAAAGGAC------TAACCGGAACGACATAATTTTCACAAATTTA--
-C----CCAAGCGGCGGGATTG-------AAAACCCGAGTTGGACGAGCAACGG------
-------------------TTGCCGCCACCGTTGC----AATTTGGTCCTGCGGCGCATA
CAGGATCGGTGAGGCCCGTTC-CTTGTT--------------------------------
----------------------------------------------------------GC
CACTCACCGTGCCTAATTTGCTCATGAATAAATTTGTGCTGTTTT----------GAATT
CCATTGAAAATGCGTTGCTAGAAGCTGACCGAAACGAAGACCAGTCTCCGATT---CCAt
ctctctctctcacgcctctctcttt----cgctctGTTTGTCTGTGAGTCTCGTCGA--G
CAACCAAAATATTATGGTGTTCCCTGCTGTTAGCGCACAGCCAGCGCGAATTTGCTGCGG
TA--AGTCGATGCTG---------------------TTTTT---GGG---------TCTG
CCAGCGAG-TCCTT----------------------------------------------
-----------------------------------TTGGGCTTCATTTTTTCTTCTTCTT
TTTTTGGTTCTTGTCGTCGG-CTGTTGTGCTGTGATTTGACATGTTTGTTAGCAGGG---
---CGCTTGACCCTGAGTTT------TG--------TG-------TGTTCCACTTTGATG
TGATTCGTCAATGCGGTGGACTACCGGCTACC---------------------------G
A--C--TCT----CG-----TCTCTGTCT-------------------------------
--------CTGTCTCCGA---------------TCTCAGAT-CTGTGGATGCGCACATCT
TGTG------CGGATGCCCAGCAGCGTTTGTTGGCGAATCT--GTGTCGGCCAGTCGCTT
GTCTGTTTGTTTGTTTGTTTCCACTGCTCTTCTGCT--------------GTT-------
--------------CCCAGTGCTGGAGTGGC---------------------------A-
--TTCG--TCAGGCTCGGCATGGGTCATCCCTGGCCTAGCCATGGAACCCCCTAGTGGGT
CATATACCGCAATGCGCTGTATTTATAGTAAACGTAGCCGATCAATT-------------
------------------------------------------------------------
------------------------------------------------------------
------------------------------------------------------------
------------------------------------------------------------
------------------------------------------------------------
------------------------------------------------------------
------------------------------------------------------------
------------------------------------------------------------
------------------------------------------------------------
------------------------------------------------------------
-----------------------------------------------------------A
AAAAAGAAACCAC-TAATTATGCGACCAA-CCACACAATATCCG-ACAATGGTTC-----
--ACCTAATTATTTGGCTCAATTGTAGGTGGCTCTTGTTGTTTGTTATTGTCTG--TTTT
TTTGTTT-------TTTTGTTG-TT---TGTCCGACACTCGACAAAAAGCGAGCCAG--T
TTTT--------AAACGATTTGTTTCTCTTTTTATGAGTTTTTT--------CCATTGTA
GG-CATTTTTA----------------------CCAGT-------GTTCG------CTGC
TCTACAAACGTCCTAATTGCGGCAGTTAGTTGTTGTTAGAGTCCTTGTGCTGCCTGGTGC
CTGGTGTC----------------------------------CTGAGA-CGTCG-CCTCG
TGAGTTCTTTTATTGCGCGCTCGCATTTCCACTAAAAATTGTGCCAT-TCAAGTCCT---
TAGGTAG--------------------------TTGTTTGACGAACGCGCCTTTTTATTG
GTGCACCTTCGGCGAAAATCGGAGCGCAACAACCGCA-----------------------
------------------------------------------------------------
-----TAT-ATTAGAAAAAATATGCGTGGGTCCTT---------------GTTGC-G---
------TTTTGGTCCCG-T---TTCGC--TTTATG-GCTGCAACGTTTTGGTCCCGCTTC
---------------------------------------------GTTCATTGTTTG-TG
TGGCAAAGAAATGGTTCA-AAAA-TTAT------------------------------GG
CAG-----TTTATGCAGATTTTTATGGAC----CGTGTTTCGCTGTTGAGGC--TTCGC-
GGAAAT--------TCGG--CCGTGTCCTGTCGTG---------------CATTCCGAGG
--------------A-CCGTA--TTAGGAATGTAGATCAATG--TTTTTTGTTTCCATTG
T-GCATTTTTTC-GCTGCCCTA-GTTTTTTTTTCCCCGAAGC----------CAAAGC--
--------GACTGCTCTAATTTTTTAATTCTTCACGGGTTTTTA----------CGATC-
-GCTGGAAAAA-------CA--GTGGAAAACAACGAAAACTCACTGAAC-----CGTTTT
CTCACAAGGTTACTCAGCACCATTTATTCCAATATAGCCAGAGAGCCTCG----------
----CTGCCGCTCTACT------------TACCTGTTAATTGTGGGCATAATTCAGTG--
--------------TTTTTAACA-CAGTTCTCAACATCCATCCATAT----TTT------
----TAT-------------TAG--------------------GGCGTGTCCATTTGTTT
GCCCATTTGTTAACGATCGT----------------------------------------
------------------------------------------------------------
------------------------------------------------------------
------------------------------------------------------------
------------------------------------------------------------
------------------------------------------------------------
------------------------------------------------------------
------------------------------------------------------------
------------------------------------------------------------
------------------------------------------------------------
-----------------------------------------GTGAAACCGAATTGACAat
acatacg----ccattatatacgt-------------atgtaaacagat-----------
----------------acaagatacataaacacacacacacatatatacac---------
---------aAT---------CTTAATACAA----TGAAATTTA----------------
----TCGAATA-AAATTTTCATACGTATTTCTAACAAACCCTTAAATTT--AGA-AAATG
GGCTTCTTTCT-GGCAAGTG----------TTATATTTATATTTTTACTA---TTGGATA
TGTATAAATGTTTGTTCTTTATGCACTGTAAATTCTGGAATGCCTGGATTTTAGATGAAA
TTGGT-TTCCTAGCCAGAGCACTTCTTTGAGACACCATTGTTTGCCGGACAGCTGACCGG
ATGGGTATGGAGG-ATCGTGAAGTTATCGGCATAGTTGCGTGGCAAAT----TGAATTTG
--GCACTGTCGGCACCCAAATA-----GCAGGCACCATAGGCGCTACTCTTGGTGATGCA
CACCAGCTTGAGATTGTAATCGATGCTCATCTTCGAGATCTCCC----TGGTGAAAGCGT
CCTTCATCAGATTCCAACTGCTCC---ACACGGAGCCAACGCAGA---------------
------------------------------------------------------------
------------------------------------------------------------
------------------------------------------------------------
----------------------------gtgtgtgtgtgtgtgtACTTCCCATAATCA--
-GCATAATCAGCGA-----GATCGGCGCTTTG--TGCGCGCA-AAATGC-CAATAAAAGA
GCAAAA-------GAGCAACAA---CAACCAATAC------AAAGGGGGCTTCCAAGTAT
TGAGG----TTTGGGCC---------------------------AAGCCGATGATGC--C
--GAAAGTGTTCAAATCGCGACAATGCTCGC------G----GTGATCG-------GGT-
------------AGGGTCAGGGCTGGGCAGGACAGG------ATCAGGT-----------
--------TACCC-AGGAACTCAGTTTCGTCAACGC--TAAGTGAA--------------
--------AGGTTAAAGGTGCTGACTGGCCTGACCGCCATAAAGGGTATTTACTGTCGCT
GCCGCAGTGTC--------------------GCGTTTAT--TTGCTTTTGGGCCCAGAAA
GAAAGGTTGCT----------------CATTCTG--------CGA---------------
-----------GCGG-CG--TGA--AACAAAAGCGCCTCAACATGCACAATAGGCAAGGT
TGT-------GGGTAGGGTTCGTCGGGGCTTTGGGCA---AGGCTTGGA-----------
---------------------------CTTGGGCTGGGCAGATCGACTTGGCCAGGTCA-
G-------------------------CG---TAGTTGGTCAGG-TAGTCGA-------GG
CACTCGAGGCGAGTT------AATGCAAATTGC-CGCGCAATATAACCCAATAATTTGAA
CTAACTCACAGCAA------------------------------C--AACAACTGG----
------------G----------------------AG--------A------G-------
--TTACTTA-----GTAATGCATAACAATAAG-----TTGAGGCTGAAATTGAGACTGAA
ATGCTGTTTGCCGA--A----------------------------GGTTT-----TCAGC
CACAACGTT----------TTTCCA--------AGGGTT--------------CTCATCG
GCATTGACTGGTTCAGAATCCTGTGCGTTAATCCGTTTTGCCATCAGCGACATTATTACT
CTA---TTTTCCATTTCTCTCTAAAATTTGAACATTTTCTCAACCGTTTGCATATCCATT
TCCATTTTCATTTTCCATTTTCACTT---TCGCC-----TGCGGATA-------------
----------------------------------------------CGAGTTAGATTTTA
TTGCAGCATCTTG----AACAATCGCCTCaactcgaactcgaactcgaacgcgaactcgG
-AATTGGATGTGCAGTTTTGGAACCATGCTGGGTTTTGTTTGCTGTCATTGCTCTAGTTT
TGCTTTCATTTCCTCACTCTT---AGCTGGTGAT------TTTTAGGCAGAAT-TCCGCT
GTCCT--GGCAT-----TGTCATTGAATC--GCC--------------GACC--GGGTTA
-----C--CCTCAAACTAGGTTT-------TTTTCGACTTT------GCTGGCG-GAGTT
TCCACATGCCTCCGT-TTTTGTTTATTTGTTT--GTAGAGATTAGAGAAAAGGGGCC-AA
TGGCTTTAGACTGATGC-------------------------------------------
----------------------------------------------------CTGATCTG
--CTCGCCTTTTCATTAGAAAGTCACACAA-ACGCATAATGAT--GACA--AGGGGGATT
AAG-----CTCACA-----TACCTA----------CACATAACCTAATTAGCGGATTTAC
-AAATTGGTTTA-TTT-----------TTTCCCTTTTTTTTATTGTAGTTGGTCTGCCCC
AG-----------CTTAAACCCAAGCCACTGCATCAGGCCAATCCAAA------------
------------------------------------------------------------
------------------------------------------------------------
------------------------------------------------------------
---------------------------TCTGGGTACAGTTG-CGCATTTTGGGCAACATG
ATTATATCATCATAATAAATGTTTGCCGCAACTAAACTG--------AAACTTTTCAAAT
TAAGTTTCAACAACTGCGCCCCCAAA----------AAGTATTT----------------
-------------------CATTG-TTTATGCAtgt--gtgtgtgtgcgtgtgtgtttgt
gtgtgtgtgcgtAGGGTGGTCTCTGTGGGCGTTGTC-C----AAAACT-------TTTGT
TTTATGAGCACAGATAAACTTCATT---------TACTGT-----TG-AAGCTGCT--AG
CTACTACAACACGCCAC-CCTCTGCCACTC-------GGCA-AGTGTGAGGCCGTTAAAC
GTGCGGC--ATAATATTAAGACTTCATAAAAGAGCAAATTATTTGGCT-GGCAACATC--
-GATCGATAT-----------------------GGCAAACTCCACCAGCAAAC----ACA
CCCAG----------TGGCG----------------------------------------
-TGCTGCTTCTCTT----------ACTC--------------------------------
-------------CGCCATCGCCA--TCGCCATCGTCGTCTCTGTG-CATTATGCCATAT
CATTCTTTTGCCTGATGAAGCCGATAAAATCCCATTATTAAGGGGGC-C---CACGTCTC
GTTCACACCCGTGGCGTCGCCCGCTTGCGGACAAGCGAAACAAAAGATTCGCTCATACGC
TATGAATATATGAAATCGCAGC-------CAGTCGCCAGTTCTCA---------------
----------------AAGA------GAGC---------AA--AA---------------
------tgatgctgctgctcccgctgctgctgct
